# Supplementary material for: Transcriptomic analysis of s-methoprene resistance in the lesser grain borer, Rhyzopertha dominica, and evaluation of piperonyl butoxide as a resistance breaker
Source: PubMed Central journal article supplement (PMC7819154; doi:10.1186/s12864-020-07354-8), 2021-01-20

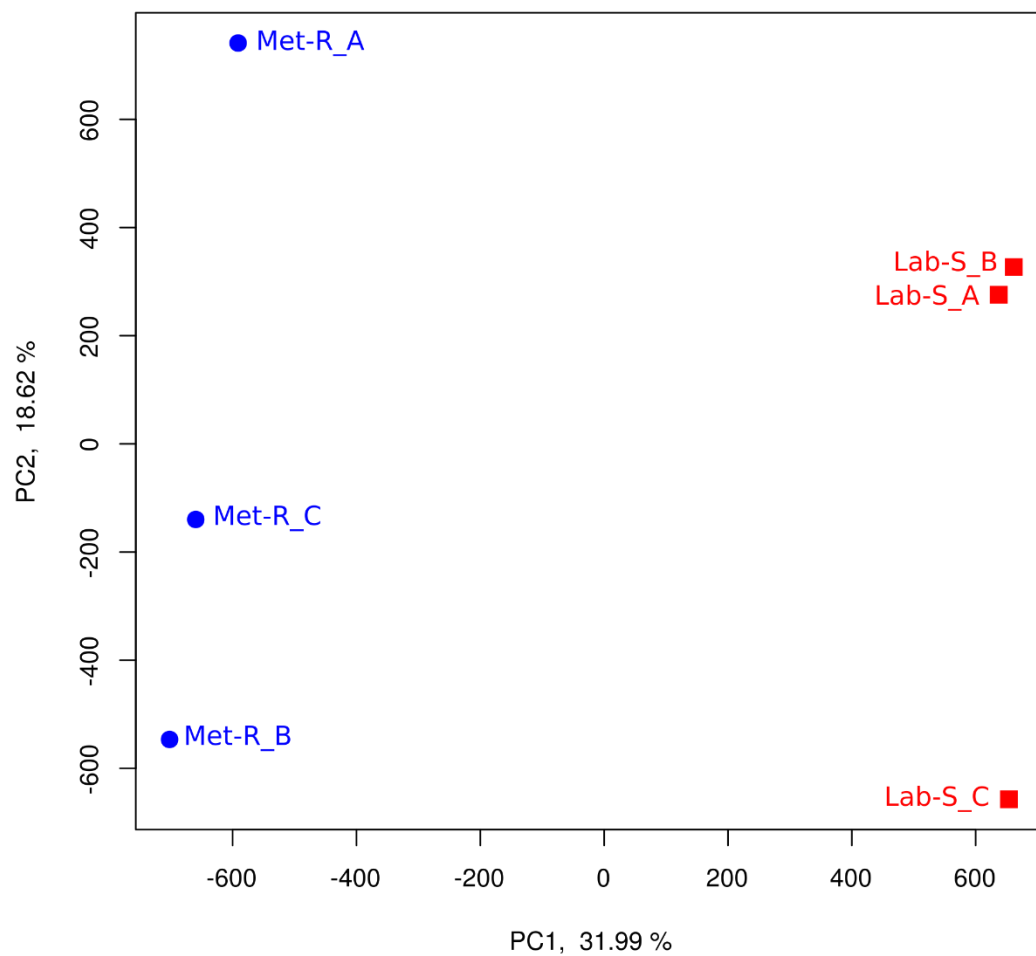

Supplement: 12864_2020_7354_MOESM2_ESM.pdf [file 12864_2020_7354_MOESM2_ESM.pdf]
