# Supplementary material for: Transcriptomic analysis of s-methoprene resistance in the lesser grain borer, Rhyzopertha dominica, and evaluation of piperonyl butoxide as a resistance breaker
Source: BMC Genomics. 2021 Jan 20;22:65. doi: 10.1186/s12864-020-07354-8 (PMC7819154; doi:10.1186/s12864-020-07354-8)
Supplement: Supplementary file 4 — Additional file 4: Table S2. Details of all up- and down-regulated genes between the resistant Met-R and the susceptible Lab-S strains (padj < 0.001, log2|FC| > 2). [file 12864_2020_7354_MOESM4_ESM.xlsx]

## Sheet: Up-regulated in Met-R
					Transcription level (TMM)
	sampleA	sampleB	PValue	FDR	Met-R_1	Met-R_2	Met-R_3	Lab-S_1	Lab-S_2	Lab-S_3	Annotation
TRINITY_DN17011_c0_g1	Met-R	Lab-S	1.84767e-54	3.45514e-50	42.501	41.94	35.216	0	0	0	UniRef50_V5GNY8 Myosin heavy chain, non-muscle n=26 Tax=Bilateria TaxID=33213 RepID=V5GNY8_ANOGL
TRINITY_DN25870_c0_g2	Met-R	Lab-S	1.13875e-51	1.06473e-47	68.459	113.684	127.628	0	0	0	No_annot
TRINITY_DN20136_c0_g1	Met-R	Lab-S	2.38487e-50	1.48657e-46	190.081	224.733	266.045	0	0	0.303	UniRef50_A0A1W4WZG9 chitinase-like protein EN03 isoform X1 n=13 Tax=Polyphaga TaxID=41084 RepID=A0A1W4WZG9_AGRPL
TRINITY_DN17583_c0_g1	Met-R	Lab-S	6.55548e-42	3.06469e-38	23.313	27.449	17.658	0	0	0	No_annot
TRINITY_DN24897_c0_g1	Met-R	Lab-S	1.06518e-38	3.98377e-35	64.906	237.685	288.472	0.054	0	0	No_annot
TRINITY_DN21023_c0_g1	Met-R	Lab-S	2.47208e-38	7.70466e-35	196.391	276.817	224.947	2.511	2.12	1.889	UniRef50_Q5UAR6 Ribosomal protein L23 n=74 Tax=Eukaryota TaxID=2759 RepID=Q5UAR6_BOMMO ## UniRef50_Q5UAR6 Ribosomal protein L23 n=74 Tax=Eukaryota TaxID=2759 RepID=Q5UAR6_BOMMO ## UniRef50_Q5UAR6 Ribosomal protein L23 n=74 Tax=Eukaryota TaxID=2759 RepID=Q5UAR6_BOMMO ## UniRef50_Q5UAR6 Ribosomal protein L23 n=74 Tax=Eukaryota TaxID=2759 RepID=Q5UAR6_BOMMO
TRINITY_DN25247_c0_g2	Met-R	Lab-S	7.70375e-37	2.058e-33	15.061	18.731	31.824	0	0	0	No_annot
TRINITY_DN17108_c0_g1	Met-R	Lab-S	1.16478e-32	2.42016e-29	10.837	18.573	19.634	0	0	0	No_annot
TRINITY_DN28513_c0_g2	Met-R	Lab-S	5.70707e-32	1.06722e-28	15.371	23.279	11.098	0	0	0	UniRef50_UPI00094EBE27 probable E3 ubiquitin-protein ligase HERC4 n=2 Tax=Bilateria TaxID=33213 RepID=UPI00094EBE27
TRINITY_DN19212_c0_g1	Met-R	Lab-S	2.07104e-31	3.22737e-28	19.991	14.896	20.327	0	0	0.221	No_annot
TRINITY_DN17993_c0_g1	Met-R	Lab-S	3.60276e-31	4.81225e-28	21.876	13.929	11.12	0	0	0	No_annot
TRINITY_DN22267_c21_g1	Met-R	Lab-S	1.93563e-29	2.34282e-26	228.442	328.708	302.172	6.714	5.524	6.756	UniRef50_Q86NF3 Eukaryotic translation Elongation Factor n=132 Tax=Eukaryota TaxID=2759 RepID=Q86NF3_CAEEL
TRINITY_DN15619_c0_g1	Met-R	Lab-S	7.20268e-29	7.92295e-26	16.433	9.105	13.525	0	0	0	UniRef50_A0A139WKL6 Filamin-A-like Protein n=5 Tax=Polyphaga TaxID=41084 RepID=A0A139WKL6_TRICA
TRINITY_DN28604_c1_g2	Met-R	Lab-S	2.95956e-28	3.07466e-25	11.217	10.759	10.853	0	0	0	No_annot
TRINITY_DN18603_c0_g1	Met-R	Lab-S	3.80931e-28	3.74916e-25	51.71	169.904	152.727	0.859	0.194	0.245	UniRef50_N6TPA2 Uncharacterized protein (Fragment) n=2 Tax=Dendroctonus ponderosae TaxID=77166 RepID=N6TPA2_DENPD
TRINITY_DN26974_c0_g1	Met-R	Lab-S	3.3572e-27	3.07916e-24	7.544	15.548	19.54	0	0	0	No_annot
TRINITY_DN24897_c0_g4	Met-R	Lab-S	3.45788e-27	3.07916e-24	147.457	602.698	710.523	0.496	0	0	No_annot
TRINITY_DN22033_c0_g1	Met-R	Lab-S	1.72158e-26	1.46334e-23	305.812	291.8	419.666	6.715	7.561	10.551	UniRef50_Q7Q3J4 AGAP007906-PA (Fragment) n=9 Tax=Anopheles TaxID=44484 RepID=Q7Q3J4_ANOGA ## UniRef50_UPI00083C72A8 ovomucoid-like n=1 Tax=Nicrophorus vespilloides TaxID=110193 RepID=UPI00083C72A8 ## UniRef50_UPI000874CE87 serine protease inhibitor dipetalogastin-like n=1 Tax=Anoplophora glabripennis TaxID=217634 RepID=UPI000874CE87
TRINITY_DN17633_c0_g1	Met-R	Lab-S	2.47946e-25	2.01591e-22	6.253	26.146	18.287	0	0	0	No_annot
TRINITY_DN15511_c0_g1	Met-R	Lab-S	7.83881e-24	6.02156e-21	6.636	10.912	11.415	0	0	0	UniRef50_A0A1Y1LZ45 Uncharacterized protein (Fragment) n=4 Tax=Bilateria TaxID=33213 RepID=A0A1Y1LZ45_PHOPY
TRINITY_DN26050_c1_g1	Met-R	Lab-S	8.05021e-24	6.02156e-21	22.074	11.739	11.098	0	0	0.26	UniRef50_A0A1W4WM96 armadillo repeat-containing protein 6 homolog n=2 Tax=Polyphaga TaxID=41084 RepID=A0A1W4WM96_AGRPL
TRINITY_DN26632_c0_g3	Met-R	Lab-S	5.02481e-23	3.48015e-20	7.278	10.679	17.867	0	0.039	0.048	UniRef50_A0A2H1W3D2 SFRICE_006151 n=1 Tax=Spodoptera frugiperda TaxID=7108 RepID=A0A2H1W3D2_SPOFR
TRINITY_DN27713_c3_g3	Met-R	Lab-S	4.3765e-22	2.74242e-19	12.542	15.512	14.107	0.118	0.427	0	No_annot
TRINITY_DN18936_c0_g1	Met-R	Lab-S	4.3996e-22	2.74242e-19	7.94	8.993	6.612	0	0	0	No_annot
TRINITY_DN18152_c0_g1	Met-R	Lab-S	5.40949e-22	3.26314e-19	24.531	4.279	29.158	0	0	0	No_annot
TRINITY_DN19263_c0_g1	Met-R	Lab-S	5.74034e-22	3.35451e-19	16.851	14.554	19.903	0	0	0.469	UniRef50_A0A1Y1KYZ8 Uncharacterized protein n=2 Tax=Polyphaga TaxID=41084 RepID=A0A1Y1KYZ8_PHOPY
TRINITY_DN18213_c0_g1	Met-R	Lab-S	2.25731e-21	1.27914e-18	13.237	6.45	6.755	0	0	0	UniRef50_A0A1W4WUJ8 calcium-activated chloride channel regulator 4-like isoform X2 n=9 Tax=Polyphaga TaxID=41084 RepID=A0A1W4WUJ8_AGRPL
TRINITY_DN21912_c0_g2	Met-R	Lab-S	1.32302e-20	6.87237e-18	56.158	48.796	62.669	1.271	2.29	3.873	UniRef50_A0A154P3Q8 Elongation factor 2 n=93 Tax=Bilateria TaxID=33213 RepID=A0A154P3Q8_9HYME
TRINITY_DN20943_c0_g1	Met-R	Lab-S	1.75118e-20	8.61763e-18	8.763	7.392	5.598	0	0	0	No_annot
TRINITY_DN18289_c0_g1	Met-R	Lab-S	6.96877e-20	3.34143e-17	12.009	6.395	5.401	0	0	0	No_annot
TRINITY_DN16891_c0_g1	Met-R	Lab-S	1.15358e-19	5.26144e-17	4.309	10.88	9.166	0	0	0	UniRef50_A0A0T6AYT3 Hydrolase (Fragment) n=1 Tax=Oryctes borbonicus TaxID=1629725 RepID=A0A0T6AYT3_9SCAR
TRINITY_DN18416_c0_g1	Met-R	Lab-S	1.89189e-19	8.4234e-17	6.581	6.513	6.024	0	0	0	No_annot
TRINITY_DN26276_c2_g1	Met-R	Lab-S	2.43538e-19	1.05911e-16	19.49	33.351	26.017	1.622	0.734	1.856	UniRef50_A0A0L7QXQ2 60S acidic ribosomal protein P1 n=3 Tax=Ecdysozoa TaxID=1206794 RepID=A0A0L7QXQ2_9HYME
TRINITY_DN18918_c0_g1	Met-R	Lab-S	3.60386e-19	1.4976e-16	21.685	21.525	12.456	0.367	0.662	0	UniRef50_A0A1Y1N1M3 Uncharacterized protein n=4 Tax=Polyphaga TaxID=41084 RepID=A0A1Y1N1M3_PHOPY
TRINITY_DN17884_c0_g1	Met-R	Lab-S	2.13225e-18	8.48363e-16	3.178	11.509	20.049	0	0	0	UniRef50_UPI00096B622A LOW QUALITY PROTEIN: muscle M-line assembly protein unc-89-like n=1 Tax=Aethina tumida TaxID=116153 RepID=UPI00096B622A
TRINITY_DN28434_c1_g4	Met-R	Lab-S	6.28306e-18	2.44778e-15	16.147	71.763	43.238	1.584	1.178	1.476	No_annot
TRINITY_DN20113_c0_g1	Met-R	Lab-S	1.8398e-17	6.88087e-15	10.443	23.555	24.978	1.18	0.78	0.55	No_annot
TRINITY_DN28512_c0_g3	Met-R	Lab-S	3.40293e-17	1.22374e-14	260.411	183.351	161.488	16.277	14.016	13.887	No_annot
TRINITY_DN19657_c0_g1	Met-R	Lab-S	7.51923e-17	2.55654e-14	5.732	4.003	6.491	0	0	0	UniRef50_D6WC02 Uncharacterized protein n=2 Tax=Tribolium castaneum TaxID=7070 RepID=D6WC02_TRICA
TRINITY_DN35689_c0_g1	Met-R	Lab-S	8.18464e-17	2.72813e-14	5.239	11.905	3.851	0	0	0	UniRef50_UPI000C251F69 solute carrier family 41 member 1-like isoform X1 n=5 Tax=Bilateria TaxID=33213 RepID=UPI000C251F69
TRINITY_DN17727_c0_g1	Met-R	Lab-S	8.31568e-17	2.72813e-14	5.293	4.141	6.59	0	0	0	UniRef50_UPI000873A14B uncharacterized protein LOC108905894 isoform X3 n=1 Tax=Anoplophora glabripennis TaxID=217634 RepID=UPI000873A14B
TRINITY_DN18009_c0_g1	Met-R	Lab-S	9.40788e-17	3.0098e-14	2.956	8.042	16.447	0	0	0	UniRef50_UPI000C25328E thiamine transporter 1-like n=1 Tax=Leptinotarsa decemlineata TaxID=7539 RepID=UPI000C25328E
TRINITY_DN18063_c0_g1	Met-R	Lab-S	1.17778e-16	3.61057e-14	7.979	4.048	4.925	0	0	0	UniRef50_D6WPD4 Autophagy-related protein 2 homolog B-like Protein n=4 Tax=Tribolium castaneum TaxID=7070 RepID=D6WPD4_TRICA
TRINITY_DN25706_c0_g2	Met-R	Lab-S	1.35831e-16	4.09684e-14	47.74	50.204	55.477	1.271	3.433	0.484	No_annot
TRINITY_DN17065_c0_g1	Met-R	Lab-S	1.80318e-16	5.26868e-14	3.232	6.429	8.56	0	0	0	UniRef50_UPI000C252522 probable cation-transporting ATPase 13A3 n=3 Tax=Polyphaga TaxID=41084 RepID=UPI000C252522
TRINITY_DN18340_c0_g1	Met-R	Lab-S	2.02694e-16	5.83136e-14	5.663	5.485	4.026	0	0	0	UniRef50_A0A1Y1LU16 Uncharacterized protein n=3 Tax=Photinus pyralis TaxID=7054 RepID=A0A1Y1LU16_PHOPY
TRINITY_DN19176_c0_g1	Met-R	Lab-S	2.86221e-16	8.1096e-14	5.412	5.499	3.998	0	0	0	UniRef50_B4H5R2 GL16210 n=2 Tax=Holometabola TaxID=33392 RepID=B4H5R2_DROPE
TRINITY_DN19905_c0_g1	Met-R	Lab-S	3.05303e-16	8.52115e-14	227.93	174.204	224.975	14.081	21.243	12.89	UniRef50_P13060 Elongation factor 2 n=120 Tax=Eukaryota TaxID=2759 RepID=EF2_DROME ## UniRef50_P13060 Elongation factor 2 n=120 Tax=Eukaryota TaxID=2759 RepID=EF2_DROME ## UniRef50_A0A154P3Q8 Elongation factor 2 n=93 Tax=Bilateria TaxID=33213 RepID=A0A154P3Q8_9HYME ## UniRef50_A0A154P3Q8 Elongation factor 2 n=93 Tax=Bilateria TaxID=33213 RepID=A0A154P3Q8_9HYME ## UniRef50_P13060 Elongation factor…
TRINITY_DN18312_c1_g1	Met-R	Lab-S	4.75077e-16	1.30646e-13	3.312	5.292	9.649	0	0	0	No_annot
TRINITY_DN20149_c0_g1	Met-R	Lab-S	5.46265e-16	1.48046e-13	160.926	120.697	41.844	5.502	3.37	2.436	No_annot
TRINITY_DN23368_c0_g1	Met-R	Lab-S	1.41267e-15	3.56985e-13	610.751	2193.07	142.928	3.029	7.079	6.205	UniRef50_UPI0001DCB6C6 uncharacterized protein LOC103312896 n=1 Tax=Tribolium castaneum TaxID=7070 RepID=UPI0001DCB6C6 ## UniRef50_UPI0001DCB6C6 uncharacterized protein LOC103312896 n=1 Tax=Tribolium castaneum TaxID=7070 RepID=UPI0001DCB6C6 ## UniRef50_UPI00083C72D7 mite allergen Der p 7-like n=1 Tax=Nicrophorus vespilloides TaxID=110193 RepID=UPI00083C72D7 ## UniRef50_UPI0001DCB6C6 uncharacteriz…
TRINITY_DN18166_c0_g1	Met-R	Lab-S	2.91932e-15	6.99888e-13	4.375	8.138	5.544	0	0.137	0	UniRef50_A0A1Y1K2G3 Uncharacterized protein (Fragment) n=1 Tax=Photinus pyralis TaxID=7054 RepID=A0A1Y1K2G3_PHOPY
TRINITY_DN19094_c0_g1	Met-R	Lab-S	5.82932e-15	1.37985e-12	6.458	2.848	5.452	0	0	0	UniRef50_D6WYN9 Uncharacterized protein n=10 Tax=Polyphaga TaxID=41084 RepID=D6WYN9_TRICA ## UniRef50_D6WYN9 Uncharacterized protein n=10 Tax=Polyphaga TaxID=41084 RepID=D6WYN9_TRICA
TRINITY_DN18227_c0_g1	Met-R	Lab-S	6.86114e-15	1.60379e-12	17.406	12.064	22.898	0.666	1.683	0.587	UniRef50_A0A139WK98 Uncharacterized protein n=2 Tax=Tribolium castaneum TaxID=7070 RepID=A0A139WK98_TRICA ## UniRef50_A0A0T6BEN9 Immunoglobulin (Fragment) n=1 Tax=Oryctes borbonicus TaxID=1629725 RepID=A0A0T6BEN9_9SCAR
TRINITY_DN24631_c0_g1	Met-R	Lab-S	7.9462e-15	1.83449e-12	10.465	4.992	6.557	0	0.2	0	No_annot
TRINITY_DN16624_c0_g1	Met-R	Lab-S	1.40478e-14	3.1273e-12	5.6	5.408	2.734	0	0	0	No_annot
TRINITY_DN18297_c0_g1	Met-R	Lab-S	1.44728e-14	3.18402e-12	2.628	7.038	5.137	0	0	0	UniRef50_A0A1W4WP25 ankyrin repeat domain-containing protein 17 isoform X1 n=4 Tax=Agrilus planipennis TaxID=224129 RepID=A0A1W4WP25_AGRPL ## UniRef50_A0A1W4WP25 ankyrin repeat domain-containing protein 17 isoform X1 n=4 Tax=Agrilus planipennis TaxID=224129 RepID=A0A1W4WP25_AGRPL
TRINITY_DN18244_c0_g1	Met-R	Lab-S	1.95803e-14	4.24512e-12	4.282	4.778	3.584	0	0	0	No_annot
TRINITY_DN18501_c0_g1	Met-R	Lab-S	1.975e-14	4.24512e-12	2.825	4.507	6.916	0	0	0	UniRef50_A0A1W4XMY3 zinc finger FYVE domain-containing protein 1 isoform X1 n=10 Tax=Polyphaga TaxID=41084 RepID=A0A1W4XMY3_AGRPL
TRINITY_DN18555_c0_g1	Met-R	Lab-S	3.10831e-14	6.53094e-12	4.097	7.21	6.669	0	0.17	0	UniRef50_A0A139WK59 Ankyrin-2-like Protein n=16 Tax=Pancrustacea TaxID=197562 RepID=A0A139WK59_TRICA ## UniRef50_A0A139WK59 Ankyrin-2-like Protein n=16 Tax=Pancrustacea TaxID=197562 RepID=A0A139WK59_TRICA
TRINITY_DN26728_c0_g1	Met-R	Lab-S	4.35379e-14	8.94679e-12	19.751	57.169	35.917	3.776	2.483	3.296	UniRef50_M4W605 Cytochrome P450 6BQ8 n=27 Tax=Cucujiformia TaxID=41088 RepID=M4W605_TRICA ## UniRef50_M4W605 Cytochrome P450 6BQ8 n=27 Tax=Cucujiformia TaxID=41088 RepID=M4W605_TRICA ## UniRef50_M4W605 Cytochrome P450 6BQ8 n=27 Tax=Cucujiformia TaxID=41088 RepID=M4W605_TRICA
TRINITY_DN20432_c0_g1	Met-R	Lab-S	6.81708e-14	1.38565e-11	380.145	910.803	643.001	24.826	16.712	51.251	UniRef50_V5I9G9 Calponin n=105 Tax=Bilateria TaxID=33213 RepID=V5I9G9_ANOGL ## UniRef50_V5I9G9 Calponin n=105 Tax=Bilateria TaxID=33213 RepID=V5I9G9_ANOGL
TRINITY_DN26791_c2_g1	Met-R	Lab-S	1.01882e-13	2.02681e-11	2.183	6.309	5.448	0	0	0	UniRef50_UPI00096B0C1E LOW QUALITY PROTEIN: probable cation-transporting ATPase 13A3 n=1 Tax=Aethina tumida TaxID=116153 RepID=UPI00096B0C1E
TRINITY_DN17196_c0_g1	Met-R	Lab-S	1.14502e-13	2.25389e-11	5.758	2.271	5.49	0	0	0	UniRef50_A0A0T6BEV4 Protein kinase n=1 Tax=Oryctes borbonicus TaxID=1629725 RepID=A0A0T6BEV4_9SCAR ## UniRef50_A0A0T6BEV4 Protein kinase n=1 Tax=Oryctes borbonicus TaxID=1629725 RepID=A0A0T6BEV4_9SCAR
TRINITY_DN28329_c2_g1	Met-R	Lab-S	1.22218e-13	2.3807e-11	9.686	12.026	10.153	0.735	0.667	0.993	UniRef50_A0A1Y1K0I6 Uncharacterized protein n=1 Tax=Photinus pyralis TaxID=7054 RepID=A0A1Y1K0I6_PHOPY ## UniRef50_A0A1Y1K0I6 Uncharacterized protein n=1 Tax=Photinus pyralis TaxID=7054 RepID=A0A1Y1K0I6_PHOPY ## UniRef50_A0A1Y1K0I6 Uncharacterized protein n=1 Tax=Photinus pyralis TaxID=7054 RepID=A0A1Y1K0I6_PHOPY ## UniRef50_A0A1Y1K0I6 Uncharacterized protein n=1 Tax=Photinus pyralis TaxID=7054 R…
TRINITY_DN18242_c0_g1	Met-R	Lab-S	1.31458e-13	2.5343e-11	8.205	6.374	7.418	0	0.325	0	UniRef50_A0A1Y1K2G3 Uncharacterized protein (Fragment) n=1 Tax=Photinus pyralis TaxID=7054 RepID=A0A1Y1K2G3_PHOPY
TRINITY_DN29665_c16_g1	Met-R	Lab-S	1.51478e-13	2.89044e-11	437.209	528.858	649.885	11.549	20.981	47.974	UniRef50_A0A154P3Q8 Elongation factor 2 n=93 Tax=Bilateria TaxID=33213 RepID=A0A154P3Q8_9HYME ## UniRef50_A0A154P3Q8 Elongation factor 2 n=93 Tax=Bilateria TaxID=33213 RepID=A0A154P3Q8_9HYME
TRINITY_DN17181_c0_g1	Met-R	Lab-S	1.60828e-13	3.03786e-11	6.167	3.483	2.968	0	0	0	No_annot
TRINITY_DN10360_c0_g1	Met-R	Lab-S	2.47496e-13	4.62817e-11	4.065	4.134	3.229	0	0	0	No_annot
TRINITY_DN28472_c0_g1	Met-R	Lab-S	2.55456e-13	4.72974e-11	2.742	8.331	3.221	0	0	0	No_annot
TRINITY_DN18870_c0_g1	Met-R	Lab-S	3.23726e-13	5.93497e-11	4.335	2.322	6.1	0	0	0	UniRef50_UPI000C2086A4 laminin subunit gamma-1 isoform X1 n=2 Tax=Onthophagus taurus TaxID=166361 RepID=UPI000C2086A4
TRINITY_DN19612_c0_g1	Met-R	Lab-S	5.22136e-13	9.29899e-11	10.698	6.045	11.635	0.373	0	0.399	UniRef50_D6X285 Uncharacterized protein n=2 Tax=Tribolium castaneum TaxID=7070 RepID=D6X285_TRICA
TRINITY_DN26223_c0_g2	Met-R	Lab-S	5.98962e-13	1.04678e-10	11.156	4.748	1.713	0	0	0	No_annot
TRINITY_DN29590_c0_g1	Met-R	Lab-S	7.87971e-13	1.36436e-10	4.118	8.367	1.939	0	0	0	No_annot
TRINITY_DN19879_c0_g1	Met-R	Lab-S	8.16057e-13	1.40002e-10	2.847	12.747	2.616	0	0	0	UniRef50_H3ADD2 Uncharacterized protein n=1 Tax=Latimeria chalumnae TaxID=7897 RepID=H3ADD2_LATCH ## UniRef50_H3ADD2 Uncharacterized protein n=1 Tax=Latimeria chalumnae TaxID=7897 RepID=H3ADD2_LATCH ## UniRef50_H3ADD2 Uncharacterized protein n=1 Tax=Latimeria chalumnae TaxID=7897 RepID=H3ADD2_LATCH ## UniRef50_H3ADD2 Uncharacterized protein n=1 Tax=Latimeria chalumnae TaxID=7897 RepID=H3ADD2_LATCH
TRINITY_DN16964_c0_g1	Met-R	Lab-S	9.93222e-13	1.68848e-10	4.026	2.734	4.282	0	0	0	No_annot
TRINITY_DN28767_c1_g4	Met-R	Lab-S	1.25652e-12	2.11225e-10	4.344	9.082	8.567	0.321	0	0	UniRef50_D6WT73 Uncharacterized protein n=1 Tax=Tribolium castaneum TaxID=7070 RepID=D6WT73_TRICA
TRINITY_DN18930_c0_g1	Met-R	Lab-S	1.89096e-12	3.10183e-10	5.606	3.005	2.744	0	0	0	No_annot
TRINITY_DN26459_c1_g9	Met-R	Lab-S	2.69477e-12	4.34415e-10	9.147	8.415	5.079	0	0.362	0	No_annot
TRINITY_DN39026_c0_g1	Met-R	Lab-S	3.1473e-12	4.98767e-10	4.424	4.145	2.299	0	0	0	UniRef50_A0A1Y1MPU2 Uncharacterized protein n=2 Tax=Holometabola TaxID=33392 RepID=A0A1Y1MPU2_PHOPY
TRINITY_DN26459_c1_g1	Met-R	Lab-S	3.60388e-12	5.61604e-10	4.326	5.228	1.918	0	0	0	UniRef50_A0A146L4U3 Uncharacterized protein (Fragment) n=1 Tax=Lygus hesperus TaxID=30085 RepID=A0A146L4U3_LYGHE
TRINITY_DN26786_c0_g1	Met-R	Lab-S	3.81842e-12	5.9012e-10	1.189	6.306	10.398	0	0	0	UniRef50_A0A067QV64 E3 ubiquitin-protein ligase n=3 Tax=Termitoidae TaxID=1912919 RepID=A0A067QV64_ZOONE
TRINITY_DN15674_c0_g1	Met-R	Lab-S	4.36551e-12	6.69139e-10	2.424	4.87	3.458	0	0	0	UniRef50_D6WAB6 DmX-like protein 2 n=8 Tax=Polyphaga TaxID=41084 RepID=D6WAB6_TRICA
TRINITY_DN18114_c0_g1	Met-R	Lab-S	5.24838e-12	7.97925e-10	5.044	2.486	3.176	0	0	0	UniRef50_UPI00096B3935 LOW QUALITY PROTEIN: uncharacterized protein LOC109602801 n=1 Tax=Aethina tumida TaxID=116153 RepID=UPI00096B3935
TRINITY_DN23427_c5_g4	Met-R	Lab-S	5.67224e-12	8.55411e-10	295.42	185.686	190.364	26.572	30.5	26.807	UniRef50_A0A0P6FE01 Actin, alpha skeletal muscle n=8 Tax=Metazoa TaxID=33208 RepID=A0A0P6FE01_9CRUS ## UniRef50_A0A0P6FE01 Actin, alpha skeletal muscle n=8 Tax=Metazoa TaxID=33208 RepID=A0A0P6FE01_9CRUS ## UniRef50_A0A0P6FE01 Actin, alpha skeletal muscle n=8 Tax=Metazoa TaxID=33208 RepID=A0A0P6FE01_9CRUS
TRINITY_DN29935_c1_g6	Met-R	Lab-S	6.11605e-12	9.1496e-10	807.739	1274.09	1423.62	93.975	158.98	84.464	UniRef50_A0A1W4WZG9 chitinase-like protein EN03 isoform X1 n=13 Tax=Polyphaga TaxID=41084 RepID=A0A1W4WZG9_AGRPL
TRINITY_DN16391_c0_g1	Met-R	Lab-S	6.51152e-12	9.66393e-10	4.573	2.67	2.924	0	0	0	UniRef50_UPI000C20780F adenylate cyclase type 2-like isoform X1 n=3 Tax=Polyphaga TaxID=41084 RepID=UPI000C20780F
TRINITY_DN18651_c0_g1	Met-R	Lab-S	9.65161e-12	1.41004e-09	7.686	7.535	5.018	0.389	0	0	No_annot
TRINITY_DN26888_c6_g1	Met-R	Lab-S	1.14472e-11	1.64663e-09	26.164	37.219	22.616	0	1.494	1.421	UniRef50_Q6EUZ8 S8e ribosomal protein (Fragment) n=2 Tax=Eukaryota TaxID=2759 RepID=Q6EUZ8_CURGL
TRINITY_DN18654_c0_g1	Met-R	Lab-S	1.2759e-11	1.80753e-09	2.656	3.448	3.486	0	0	0	UniRef50_UPI00096B44B1 LOW QUALITY PROTEIN: fatty acid synthase-like n=3 Tax=Aethina tumida TaxID=116153 RepID=UPI00096B44B1
TRINITY_DN29704_c0_g2	Met-R	Lab-S	1.56363e-11	2.19848e-09	3.698	3.405	2.494	0	0	0	UniRef50_UPI000C20238F gem-associated protein 5 n=1 Tax=Onthophagus taurus TaxID=166361 RepID=UPI000C20238F
TRINITY_DN20446_c0_g1	Met-R	Lab-S	1.64701e-11	2.29843e-09	16.176	15.117	20.062	1.804	2.733	2.717	No_annot
TRINITY_DN27496_c0_g3	Met-R	Lab-S	1.69747e-11	2.33402e-09	1.68	4.814	4.64	0	0	0	UniRef50_A0A1Y1KEF7 UDP-glucuronosyltransferase n=7 Tax=Photinus pyralis TaxID=7054 RepID=A0A1Y1KEF7_PHOPY
TRINITY_DN27214_c1_g3	Met-R	Lab-S	2.16422e-11	2.89078e-09	729.6	1568.32	442.137	53.544	31.015	81.603	No_annot
TRINITY_DN29308_c1_g3	Met-R	Lab-S	2.38504e-11	3.16314e-09	1.719	4.936	4.078	0	0	0	No_annot
TRINITY_DN22963_c6_g1	Met-R	Lab-S	2.85251e-11	3.7302e-09	9.381	13.762	15.112	1.433	0.86	1.632	UniRef50_P25843 Profilin n=36 Tax=Pancrustacea TaxID=197562 RepID=PROF_DROME
TRINITY_DN26975_c0_g2	Met-R	Lab-S	3.13697e-11	4.05378e-09	2.252	3.312	3.899	0	0	0	UniRef50_A0A1W4XFX3 sodium/potassium-transporting ATPase subunit beta-1-interacting protein-like n=1 Tax=Agrilus planipennis TaxID=224129 RepID=A0A1W4XFX3_AGRPL
TRINITY_DN27584_c0_g8	Met-R	Lab-S	3.25015e-11	4.16286e-09	11.234	10.885	9.757	0.958	0.087	0.671	UniRef50_UPI000873922E orphan steroid hormone receptor 2-like isoform X2 n=1 Tax=Anoplophora glabripennis TaxID=217634 RepID=UPI000873922E ## UniRef50_UPI000874747A uncharacterized protein LOC108916473 n=2 Tax=Anoplophora glabripennis TaxID=217634 RepID=UPI000874747A ## UniRef50_UPI000874747A uncharacterized protein LOC108916473 n=2 Tax=Anoplophora glabripennis TaxID=217634 RepID=UPI000874747A ##…
TRINITY_DN19552_c0_g1	Met-R	Lab-S	7.09526e-11	8.61567e-09	2.423	4.747	2.362	0	0	0	No_annot
TRINITY_DN18821_c0_g1	Met-R	Lab-S	9.38149e-11	1.12458e-08	4.29	3.138	1.884	0	0	0	No_annot
TRINITY_DN22766_c0_g2	Met-R	Lab-S	1.02787e-10	1.22428e-08	2.265	2.438	4.697	0	0	0	UniRef50_A0A0A9YIF8 COP9 signalosome complex subunit 6 n=22 Tax=Eumetazoa TaxID=6072 RepID=A0A0A9YIF8_LYGHE
TRINITY_DN18484_c0_g1	Met-R	Lab-S	1.65068e-10	1.91725e-08	1.464	3.125	5.994	0	0	0	UniRef50_A0A139WGR3 Apolipophorins-like protein n=7 Tax=Cucujiformia TaxID=41088 RepID=A0A139WGR3_TRICA
TRINITY_DN24237_c0_g1	Met-R	Lab-S	1.69051e-10	1.95139e-08	6.816	4.035	3.426	0	0.23	0	No_annot
TRINITY_DN28507_c9_g3	Met-R	Lab-S	1.78571e-10	2.04864e-08	10.435	8.748	6.881	0.563	0	0	UniRef50_A0A0P5F2K0 V-type proton ATPase catalytic subunit A-like protein n=2 Tax=root TaxID=1 RepID=A0A0P5F2K0_9CRUS
TRINITY_DN28972_c0_g1	Met-R	Lab-S	2.13299e-10	2.38844e-08	1.552	4.144	3.629	0	0	0	UniRef50_A0A1Y1LH81 Uncharacterized protein (Fragment) n=1 Tax=Photinus pyralis TaxID=7054 RepID=A0A1Y1LH81_PHOPY
TRINITY_DN16826_c0_g1	Met-R	Lab-S	2.26568e-10	2.507e-08	4.347	3.107	1.704	0	0	0	No_annot
TRINITY_DN27582_c0_g1	Met-R	Lab-S	2.51335e-10	2.76468e-08	7.408	16.32	10.325	1.436	0.729	1.094	UniRef50_A0A1Y1JZG0 Uncharacterized protein (Fragment) n=2 Tax=Photinus pyralis TaxID=7054 RepID=A0A1Y1JZG0_PHOPY ## UniRef50_A0A0T6B1E4 VWA domain-containing protein n=1 Tax=Oryctes borbonicus TaxID=1629725 RepID=A0A0T6B1E4_9SCAR
TRINITY_DN25085_c5_g2	Met-R	Lab-S	3.2315e-10	3.51332e-08	110.986	77.226	184.811	9.862	13.297	20.379	No_annot
TRINITY_DN17662_c0_g1	Met-R	Lab-S	3.53345e-10	3.81939e-08	6.265	8.178	6.973	0	0.493	0	UniRef50_U4U2A1 Uncharacterized protein (Fragment) n=2 Tax=Neoptera TaxID=33340 RepID=U4U2A1_DENPD
TRINITY_DN17688_c0_g1	Met-R	Lab-S	3.74341e-10	4.0001e-08	1.748	3.056	4.057	0	0	0	UniRef50_A0A0T6B1T8 Uncharacterized protein (Fragment) n=1 Tax=Oryctes borbonicus TaxID=1629725 RepID=A0A0T6B1T8_9SCAR
TRINITY_DN26444_c1_g1	Met-R	Lab-S	3.84988e-10	4.0905e-08	46.406	24.665	25.12	6.737	2.927	3.638	UniRef50_A0A1J1IDA1 CLUMA_CG011558, isoform A n=1 Tax=Clunio marinus TaxID=568069 RepID=A0A1J1IDA1_9DIPT ## UniRef50_V5GBN2 Uncharacterized protein (Fragment) n=1 Tax=Anoplophora glabripennis TaxID=217634 RepID=V5GBN2_ANOGL ## UniRef50_V5GMZ0 DNA topoisomerase 1 (Fragment) n=6 Tax=Eumetazoa TaxID=6072 RepID=V5GMZ0_ANOGL ## UniRef50_A0A0A7CIX0 Hormone receptor 78 n=1 Tax=Tigriopus japonicus TaxID=…
TRINITY_DN10469_c0_g1	Met-R	Lab-S	5.27597e-10	5.57405e-08	3.962	4.66	1.136	0	0	0	No_annot
TRINITY_DN29304_c2_g2	Met-R	Lab-S	5.40302e-10	5.61708e-08	7.027	3.048	4.926	0.113	0.308	0	No_annot
TRINITY_DN27842_c0_g2	Met-R	Lab-S	5.40682e-10	5.61708e-08	235.822	166.885	197.986	30.738	19.477	37.551	UniRef50_P17704 40S ribosomal protein S17 n=59 Tax=Eukaryota TaxID=2759 RepID=RS17_DROME ## UniRef50_P17704 40S ribosomal protein S17 n=59 Tax=Eukaryota TaxID=2759 RepID=RS17_DROME ## UniRef50_P17704 40S ribosomal protein S17 n=59 Tax=Eukaryota TaxID=2759 RepID=RS17_DROME ## UniRef50_P17704 40S ribosomal protein S17 n=59 Tax=Eukaryota TaxID=2759 RepID=RS17_DROME ## UniRef50_P17704 40S ribosomal p…
TRINITY_DN29929_c3_g3	Met-R	Lab-S	5.84461e-10	6.03836e-08	6.642	9.103	10.252	0.409	0.553	1.176	No_annot
TRINITY_DN30067_c0_g2	Met-R	Lab-S	6.25004e-10	6.42175e-08	138.402	103.692	105.817	0	0	1.935	No_annot
TRINITY_DN17027_c0_g1	Met-R	Lab-S	6.53144e-10	6.6742e-08	0.416	5.34	26.32	0	0	0	UniRef50_F4X1H4 Myosin heavy chain, non-muscle n=5 Tax=Bilateria TaxID=33213 RepID=F4X1H4_ACREC
TRINITY_DN17079_c0_g1	Met-R	Lab-S	6.83867e-10	6.95017e-08	7.043	1.071	2.938	0	0	0	UniRef50_D6WQ00 Uncharacterized protein n=8 Tax=Cucujiformia TaxID=41088 RepID=D6WQ00_TRICA
TRINITY_DN28434_c1_g2	Met-R	Lab-S	7.85091e-10	7.89312e-08	4.856	19.519	9.537	0.663	0.301	1.004	No_annot
TRINITY_DN18581_c0_g1	Met-R	Lab-S	8.55822e-10	8.55822e-08	0.363	5.469	33.07	0	0	0	UniRef50_V5GNY8 Myosin heavy chain, non-muscle n=26 Tax=Bilateria TaxID=33213 RepID=V5GNY8_ANOGL
TRINITY_DN24658_c0_g2	Met-R	Lab-S	1.09763e-09	1.0803e-07	3.108	6.151	2.67	0	0.168	0.055	UniRef50_A0A1Y3BWC8 Haloacid dehalogenase-like protein hydrolase domain-containing protein n=5 Tax=Arthropoda TaxID=6656 RepID=A0A1Y3BWC8_EURMA ## UniRef50_Q3UGR5 Haloacid dehalogenase-like hydrolase domain-containing protein 2 n=285 Tax=Bilateria TaxID=33213 RepID=HDHD2_MOUSE ## UniRef50_UPI0007381CE4 haloacid dehalogenase-like hydrolase domain-containing protein 2 isoform X2 n=2 Tax=Apocrita Ta…
TRINITY_DN27734_c3_g1	Met-R	Lab-S	1.30323e-09	1.26929e-07	3.347	3.119	1.714	0	0	0	No_annot
TRINITY_DN17888_c0_g1	Met-R	Lab-S	1.3999e-09	1.34939e-07	2.336	1.002	8.838	0	0	0	UniRef50_A0A1Y1K3A7 Uncharacterized protein n=3 Tax=Holometabola TaxID=33392 RepID=A0A1Y1K3A7_PHOPY ## UniRef50_A0A1Y1K3A7 Uncharacterized protein n=3 Tax=Holometabola TaxID=33392 RepID=A0A1Y1K3A7_PHOPY
TRINITY_DN16870_c0_g1	Met-R	Lab-S	1.83787e-09	1.74458e-07	2.691	2.664	2.438	0	0	0	UniRef50_UPI00094E6242 neurogenic locus notch homolog protein 1-like n=1 Tax=Dendroctonus ponderosae TaxID=77166 RepID=UPI00094E6242
TRINITY_DN24842_c5_g1	Met-R	Lab-S	2.13693e-09	2.00807e-07	11.916	12.366	10.193	0.859	0	0	No_annot
TRINITY_DN18049_c0_g1	Met-R	Lab-S	2.52107e-09	2.3572e-07	2.635	1.398	4.611	0	0	0	UniRef50_A0A1W4WSR8 cytoskeleton-associated protein 5 isoform X1 n=3 Tax=Agrilus planipennis TaxID=224129 RepID=A0A1W4WSR8_AGRPL
TRINITY_DN24057_c5_g2	Met-R	Lab-S	3.12622e-09	2.86571e-07	349.991	1599.32	23.735	3.362	8.663	8.461	UniRef50_H9JQ28 Uncharacterized protein n=2 Tax=Obtectomera TaxID=104431 RepID=H9JQ28_BOMMO ## UniRef50_H9JQ28 Uncharacterized protein n=2 Tax=Obtectomera TaxID=104431 RepID=H9JQ28_BOMMO ## UniRef50_A0A0A1WZC5 Brevican core protein n=36 Tax=Holometabola TaxID=33392 RepID=A0A0A1WZC5_ZEUCU ## UniRef50_A0A2C9GWR3 Uncharacterized protein n=1 Tax=Anopheles funestus TaxID=62324 RepID=A0A2C9GWR3_ANOFN
TRINITY_DN20531_c0_g1	Met-R	Lab-S	3.33449e-09	3.04171e-07	3.557	2.036	2.234	0	0	0	No_annot
TRINITY_DN17612_c0_g1	Met-R	Lab-S	3.44991e-09	3.13172e-07	3.495	12.318	12.937	0.483	0	0.551	UniRef50_A0A139WGR3 Apolipophorins-like protein n=7 Tax=Cucujiformia TaxID=41088 RepID=A0A139WGR3_TRICA
TRINITY_DN18040_c0_g1	Met-R	Lab-S	3.55556e-09	3.21203e-07	1.069	4.593	3.155	0	0	0	No_annot
TRINITY_DN40043_c0_g1	Met-R	Lab-S	3.67379e-09	3.30288e-07	20.538	24.387	28.999	4.412	1.418	4.848	UniRef50_A0A0T6B571 Elongation of very long chain fatty acids protein n=3 Tax=Bilateria TaxID=33213 RepID=A0A0T6B571_9SCAR
TRINITY_DN27665_c2_g5	Met-R	Lab-S	3.90528e-09	3.44475e-07	4.034	3.214	3.461	0.135	0.098	0.101	UniRef50_A0A1B6CSG2 Uncharacterized protein (Fragment) n=9 Tax=Pancrustacea TaxID=197562 RepID=A0A1B6CSG2_9HEMI ## UniRef50_A0A1B6CSG2 Uncharacterized protein (Fragment) n=9 Tax=Pancrustacea TaxID=197562 RepID=A0A1B6CSG2_9HEMI ## UniRef50_A0A0A1WMK8 Transposable element Tc3 transposase n=16 Tax=Neoptera TaxID=33340 RepID=A0A0A1WMK8_ZEUCU ## UniRef50_A0A0A1WMK8 Transposable element Tc3 transposase…
TRINITY_DN29083_c0_g2	Met-R	Lab-S	4.5847e-09	4.02506e-07	22.453	11.067	27.964	2.494	0.343	2.102	UniRef50_A0A0D3M0J3 Elongation factor (Fragment) n=51 Tax=Metazoa TaxID=33208 RepID=A0A0D3M0J3_9MUSC ## UniRef50_Q5ETK3 Elongation factor 1 alpha (Fragment) n=89 Tax=Opisthokonta TaxID=33154 RepID=Q5ETK3_9NEOP ## UniRef50_Q6U7A1 Elongation factor 1-alpha (Fragment) n=1437 Tax=Opisthokonta TaxID=33154 RepID=Q6U7A1_9CUCU
TRINITY_DN26888_c5_g1	Met-R	Lab-S	5.57541e-09	4.87197e-07	5.302	17.599	16.707	1.797	1.081	1.027	UniRef50_Q8MLY8 40S ribosomal protein S8 n=116 Tax=Eukaryota TaxID=2759 RepID=RS8_DROME
TRINITY_DN18162_c0_g1	Met-R	Lab-S	5.90152e-09	5.13295e-07	2.601	3.715	1.525	0	0	0	UniRef50_A0A1W4XU19 LOW QUALITY PROTEIN: DENN domain-containing protein 5B n=16 Tax=Polyphaga TaxID=41084 RepID=A0A1W4XU19_AGRPL
TRINITY_DN26835_c0_g2	Met-R	Lab-S	6.34224e-09	5.46543e-07	3.496	1.832	2.259	0	0	0	UniRef50_A0A1B0CKG3 Uncharacterized protein n=1 Tax=Lutzomyia longipalpis TaxID=7200 RepID=A0A1B0CKG3_LUTLO
TRINITY_DN23254_c0_g1	Met-R	Lab-S	6.73973e-09	5.78133e-07	3.971	6.861	9.157	0.581	0.643	0.161	UniRef50_A0A1Y1NB46 Uncharacterized protein n=5 Tax=Polyphaga TaxID=41084 RepID=A0A1Y1NB46_PHOPY ## UniRef50_A0A1Y1NB46 Uncharacterized protein n=5 Tax=Polyphaga TaxID=41084 RepID=A0A1Y1NB46_PHOPY ## UniRef50_UPI00077DCF1A uncharacterized protein LOC103314505 n=1 Tax=Tribolium castaneum TaxID=7070 RepID=UPI00077DCF1A ## UniRef50_UPI00077DCF1A uncharacterized protein LOC103314505 n=1 Tax=Tribolium…
TRINITY_DN26325_c0_g4	Met-R	Lab-S	8.24772e-09	6.94741e-07	3.579	2.308	2.857	0	0	0.101	No_annot
TRINITY_DN30190_c3_g1	Met-R	Lab-S	9.23912e-09	7.71301e-07	19.707	14.698	17.589	3.981	2.619	3.898	UniRef50_A0A1Y1LMA2 Uncharacterized protein n=1 Tax=Photinus pyralis TaxID=7054 RepID=A0A1Y1LMA2_PHOPY ## UniRef50_A0A1Y1LMA2 Uncharacterized protein n=1 Tax=Photinus pyralis TaxID=7054 RepID=A0A1Y1LMA2_PHOPY
TRINITY_DN26853_c11_g2	Met-R	Lab-S	9.70173e-09	8.06322e-07	3951.23	9009.33	8684.99	204.841	1067.07	316.055	No_annot
TRINITY_DN16955_c0_g1	Met-R	Lab-S	1.12165e-08	9.19954e-07	10.981	8.983	10.276	1.764	1.593	1.612	UniRef50_UPI0006C97942 target of rapamycin n=2 Tax=Chalcidoidea TaxID=7422 RepID=UPI0006C97942
TRINITY_DN27145_c2_g2	Met-R	Lab-S	1.21211e-08	9.85502e-07	2.58	3.328	1.52	0	0	0	No_annot
TRINITY_DN24697_c2_g1	Met-R	Lab-S	1.22568e-08	9.92218e-07	1321.4	2833.41	3979.11	396.7	342.659	352.332	UniRef50_UPI00083C5EA1 uncharacterized protein LOC108563662 n=1 Tax=Nicrophorus vespilloides TaxID=110193 RepID=UPI00083C5EA1 ## UniRef50_UPI00096B2543 uncharacterized protein LOC109594145 n=1 Tax=Aethina tumida TaxID=116153 RepID=UPI00096B2543 ## UniRef50_UPI00083C5EA1 uncharacterized protein LOC108563662 n=1 Tax=Nicrophorus vespilloides TaxID=110193 RepID=UPI00083C5EA1 ## UniRef50_UPI000C20416A…
TRINITY_DN18129_c0_g1	Met-R	Lab-S	1.2474e-08	1.00295e-06	2.873	2.454	1.923	0	0	0	No_annot
TRINITY_DN18521_c0_g1	Met-R	Lab-S	1.24967e-08	1.00295e-06	2.589	1.539	3.379	0	0	0	UniRef50_UPI000C20F796 histone-lysine N-methyltransferase 2C isoform X1 n=8 Tax=Onthophagus taurus TaxID=166361 RepID=UPI000C20F796
TRINITY_DN17681_c0_g1	Met-R	Lab-S	1.27264e-08	1.01702e-06	3.539	1.423	2.594	0	0	0	No_annot
TRINITY_DN26305_c3_g1	Met-R	Lab-S	1.45181e-08	1.15037e-06	11.299	66.4	27.086	1.749	2.364	4.989	UniRef50_UPI000C2049AD transmembrane protease serine 9-like n=1 Tax=Onthophagus taurus TaxID=166361 RepID=UPI000C2049AD
TRINITY_DN18590_c0_g1	Met-R	Lab-S	1.47665e-08	1.16512e-06	2.212	3.796	1.557	0	0	0	UniRef50_UPI000C20ACF7 unconventional myosin-Va n=2 Tax=Polyphaga TaxID=41084 RepID=UPI000C20ACF7
TRINITY_DN16803_c0_g1	Met-R	Lab-S	1.57111e-08	1.22928e-06	2.239	1.204	4.64	0	0	0	UniRef50_A0A1Y1NDF1 Uncharacterized protein (Fragment) n=4 Tax=Bilateria TaxID=33213 RepID=A0A1Y1NDF1_PHOPY
TRINITY_DN24562_c2_g4	Met-R	Lab-S	1.7181e-08	1.33313e-06	2.614	3.093	1.63	0	0	0	No_annot
TRINITY_DN28175_c1_g1	Met-R	Lab-S	1.80336e-08	1.3935e-06	31.561	13.552	23.857	4.449	5.094	3.008	UniRef50_A0A1W4XDT4 Kinesin-like protein n=11 Tax=Polyphaga TaxID=41084 RepID=A0A1W4XDT4_AGRPL ## UniRef50_A0A1W4XDT4 Kinesin-like protein n=11 Tax=Polyphaga TaxID=41084 RepID=A0A1W4XDT4_AGRPL ## UniRef50_A0A0T6BBQ5 Kinesin-like protein (Fragment) n=1 Tax=Oryctes borbonicus TaxID=1629725 RepID=A0A0T6BBQ5_9SCAR ## UniRef50_A0A0T6BBQ5 Kinesin-like protein (Fragment) n=1 Tax=Oryctes borbonicus TaxID…
TRINITY_DN1784_c0_g1	Met-R	Lab-S	2.03338e-08	1.56478e-06	6.288	13.176	20.944	0.656	0.593	2.128	No_annot
TRINITY_DN20748_c0_g1	Met-R	Lab-S	2.12139e-08	1.62582e-06	22.183	225.267	0.893	0.038	0.069	0.457	UniRef50_UPI000C205EBC zinc metalloproteinase nas-7-like n=1 Tax=Onthophagus taurus TaxID=166361 RepID=UPI000C205EBC ## UniRef50_UPI000C205EBC zinc metalloproteinase nas-7-like n=1 Tax=Onthophagus taurus TaxID=166361 RepID=UPI000C205EBC ## UniRef50_UPI000C1FFDA1 zinc metalloproteinase nas-4-like n=1 Tax=Onthophagus taurus TaxID=166361 RepID=UPI000C1FFDA1 ## UniRef50_UPI000C205EBC zinc metalloprot…
TRINITY_DN18042_c0_g1	Met-R	Lab-S	2.1588e-08	1.64774e-06	2.328	5.802	6.351	0	0.338	0	UniRef50_A0A182MPF0 Uncharacterized protein n=3 Tax=Bilateria TaxID=33213 RepID=A0A182MPF0_9DIPT
TRINITY_DN12177_c0_g1	Met-R	Lab-S	2.22181e-08	1.68894e-06	6.242	24.432	4.56	0.56	0.612	1.077	UniRef50_D6WRB3 Uncharacterized protein n=2 Tax=Tribolium castaneum TaxID=7070 RepID=D6WRB3_TRICA
TRINITY_DN29665_c20_g9	Met-R	Lab-S	2.81996e-08	2.10933e-06	1103.2	1378.58	1480.41	175.32	225.045	301.637	UniRef50_T1J7D8 Uncharacterized protein n=3 Tax=Metazoa TaxID=33208 RepID=T1J7D8_STRMM
TRINITY_DN19147_c0_g1	Met-R	Lab-S	3.98725e-08	2.9471e-06	1.585	2.734	2.79	0	0	0	UniRef50_A0A1B6KAW8 Uncharacterized protein (Fragment) n=2 Tax=Neoptera TaxID=33340 RepID=A0A1B6KAW8_9HEMI ## UniRef50_A0A1B6KAW8 Uncharacterized protein (Fragment) n=2 Tax=Neoptera TaxID=33340 RepID=A0A1B6KAW8_9HEMI
TRINITY_DN27842_c0_g3	Met-R	Lab-S	4.01418e-08	2.94867e-06	341.087	326.65	242.328	61.075	60.408	62.33	UniRef50_A0A288NBF4 Uncharacterized protein (Fragment) n=3 Tax=Cloeon TaxID=197151 RepID=A0A288NBF4_9INSE
TRINITY_DN26892_c0_g1	Met-R	Lab-S	4.02092e-08	2.94867e-06	9.709	29.025	26.919	2.579	4.59	3.03	UniRef50_UPI000C2551AF protein takeout-like n=2 Tax=Polyphaga TaxID=41084 RepID=UPI000C2551AF ## UniRef50_UPI000C2551AF protein takeout-like n=2 Tax=Polyphaga TaxID=41084 RepID=UPI000C2551AF ## UniRef50_A0A1B6DRW7 Uncharacterized protein (Fragment) n=2 Tax=Clastoptera arizonana TaxID=38151 RepID=A0A1B6DRW7_9HEMI ## UniRef50_UPI000C2551AF protein takeout-like n=2 Tax=Polyphaga TaxID=41084 RepID=UP…
TRINITY_DN16693_c0_g1	Met-R	Lab-S	5.77983e-08	4.1253e-06	3.418	6.493	6.321	0.472	0	0	UniRef50_A0A1W4X0I8 supervillin isoform X1 n=2 Tax=Agrilus planipennis TaxID=224129 RepID=A0A1W4X0I8_AGRPL
TRINITY_DN40222_c0_g1	Met-R	Lab-S	5.97606e-08	4.24914e-06	3.051	1.975	3.131	0	0.13	0	UniRef50_UPI00084E90F0 uncharacterized protein LOC108728212 n=3 Tax=Myrmicinae TaxID=34695 RepID=UPI00084E90F0
TRINITY_DN24429_c1_g1	Met-R	Lab-S	6.54676e-08	4.60411e-06	1.757	2.579	3.605	0.056	0	0.063	UniRef50_A0A1Y1K8N8 Uncharacterized protein (Fragment) n=1 Tax=Photinus pyralis TaxID=7054 RepID=A0A1Y1K8N8_PHOPY
TRINITY_DN23958_c2_g2	Met-R	Lab-S	6.54916e-08	4.60411e-06	15.72	1.325	0.725	0.041	0	0	No_annot
TRINITY_DN26675_c0_g2	Met-R	Lab-S	6.7806e-08	4.71365e-06	88.374	179.962	316.559	0.874	1.252	14.554	No_annot
TRINITY_DN29887_c6_g2	Met-R	Lab-S	7.31558e-08	5.04802e-06	3.605	1.832	5.322	0	0	0.236	No_annot
TRINITY_DN17769_c0_g1	Met-R	Lab-S	7.53175e-08	5.17808e-06	6.034	5.733	6.554	0.878	0.806	0.535	No_annot
TRINITY_DN15191_c0_g1	Met-R	Lab-S	8.3891e-08	5.74638e-06	3.19	2.481	3.982	0	0.06	0.224	No_annot
TRINITY_DN29382_c0_g3	Met-R	Lab-S	9.73137e-08	6.54592e-06	1.483	2.257	3.224	0	0	0	No_annot
TRINITY_DN27744_c0_g1	Met-R	Lab-S	1.14304e-07	7.63387e-06	6.284	17.051	1.049	0	0.025	0.34	UniRef50_K7JGN9 Uncharacterized protein n=3 Tax=Nasonia vitripennis TaxID=7425 RepID=K7JGN9_NASVI ## UniRef50_K7JGN9 Uncharacterized protein n=3 Tax=Nasonia vitripennis TaxID=7425 RepID=K7JGN9_NASVI ## UniRef50_K7JGN9 Uncharacterized protein n=3 Tax=Nasonia vitripennis TaxID=7425 RepID=K7JGN9_NASVI
TRINITY_DN16252_c0_g1	Met-R	Lab-S	1.27073e-07	8.45645e-06	2.879	4.087	4.098	0.307	0	0	UniRef50_UPI00094EFDC6 prolow-density lipoprotein receptor-related protein 1-like n=2 Tax=Eumetazoa TaxID=6072 RepID=UPI00094EFDC6
TRINITY_DN26600_c1_g1	Met-R	Lab-S	1.28778e-07	8.53955e-06	4.088	8.865	5.553	0.152	0.763	0.62	UniRef50_UPI000874B6C5 uncharacterized protein LOC108911014 n=1 Tax=Anoplophora glabripennis TaxID=217634 RepID=UPI000874B6C5 ## UniRef50_UPI000874B6C5 uncharacterized protein LOC108911014 n=1 Tax=Anoplophora glabripennis TaxID=217634 RepID=UPI000874B6C5 ## UniRef50_UPI000874B6C5 uncharacterized protein LOC108911014 n=1 Tax=Anoplophora glabripennis TaxID=217634 RepID=UPI000874B6C5
TRINITY_DN29665_c17_g1	Met-R	Lab-S	1.33164e-07	8.79918e-06	8.726	13.937	8.053	0.706	2.114	1.467	UniRef50_A0A161MYZ0 Translation elongation factor 2 (Fragment) n=8 Tax=Bilateria TaxID=33213 RepID=A0A161MYZ0_TRIIF ## UniRef50_A0A161MYZ0 Translation elongation factor 2 (Fragment) n=8 Tax=Bilateria TaxID=33213 RepID=A0A161MYZ0_TRIIF
TRINITY_DN28965_c1_g1	Met-R	Lab-S	1.39533e-07	9.15531e-06	2.673	2.87	1.262	0	0	0	No_annot
TRINITY_DN29599_c3_g3	Met-R	Lab-S	1.465e-07	9.57886e-06	129.343	182.536	207.215	42.199	23.393	38.737	No_annot
TRINITY_DN26106_c2_g1	Met-R	Lab-S	1.59589e-07	1.03804e-05	0.619	4.777	2.501	0	0	0	No_annot
TRINITY_DN25031_c1_g1	Met-R	Lab-S	1.59869e-07	1.03804e-05	24.27	52.616	68.065	0	2.021	0	No_annot
TRINITY_DN28627_c11_g1	Met-R	Lab-S	1.70521e-07	1.10337e-05	89.766	155.174	192.627	20.333	2.494	2.108	UniRef50_UPI00083C8F72 uncharacterized protein LOC108561622 n=1 Tax=Nicrophorus vespilloides TaxID=110193 RepID=UPI00083C8F72
TRINITY_DN15979_c0_g1	Met-R	Lab-S	1.83664e-07	1.17621e-05	6.738	5.324	5.596	0.623	0	0.474	UniRef50_UPI000C254308 uncharacterized protein LOC111511493 n=1 Tax=Leptinotarsa decemlineata TaxID=7539 RepID=UPI000C254308
TRINITY_DN29465_c0_g1	Met-R	Lab-S	1.85162e-07	1.18175e-05	4.649	6.622	16.094	1.022	1.037	1.095	UniRef50_A0A1Y1JUB3 Uncharacterized protein n=3 Tax=Photinus pyralis TaxID=7054 RepID=A0A1Y1JUB3_PHOPY ## UniRef50_A0A1Y1K0I6 Uncharacterized protein n=1 Tax=Photinus pyralis TaxID=7054 RepID=A0A1Y1K0I6_PHOPY ## UniRef50_A0A1Y1JUB3 Uncharacterized protein n=3 Tax=Photinus pyralis TaxID=7054 RepID=A0A1Y1JUB3_PHOPY
TRINITY_DN25621_c1_g3	Met-R	Lab-S	1.92591e-07	1.22498e-05	24.613	36.237	53.692	3.514	3.569	10.839	No_annot
TRINITY_DN30069_c5_g5	Met-R	Lab-S	2.104e-07	1.32474e-05	7.017	4.989	4.361	0.692	0.29	0.735	No_annot
TRINITY_DN18313_c0_g1	Met-R	Lab-S	2.41688e-07	1.51156e-05	1.057	1.135	5.612	0	0	0	UniRef50_A0A1Y1MC36 Uncharacterized protein (Fragment) n=1 Tax=Photinus pyralis TaxID=7054 RepID=A0A1Y1MC36_PHOPY
TRINITY_DN25835_c3_g6	Met-R	Lab-S	2.73079e-07	1.69092e-05	4.519	2.817	0.441	0	0	0	No_annot
TRINITY_DN27567_c0_g1	Met-R	Lab-S	2.78245e-07	1.71722e-05	87.971	120.327	56.64	18.425	12.434	22.696	No_annot
TRINITY_DN21906_c0_g2	Met-R	Lab-S	3.07925e-07	1.89414e-05	5.342	3.311	4.193	0.502	0	0.258	UniRef50_UPI000C20834E chromosome-associated kinesin KIF4A n=1 Tax=Onthophagus taurus TaxID=166361 RepID=UPI000C20834E ## UniRef50_A0A1W4XDT4 Kinesin-like protein n=11 Tax=Polyphaga TaxID=41084 RepID=A0A1W4XDT4_AGRPL
TRINITY_DN26343_c2_g3	Met-R	Lab-S	4.09144e-07	2.49218e-05	8.198	10.395	9.352	0.295	0.126	1.624	UniRef50_Q8MR45 Putative N(4)-(beta-N-acetylglucosaminyl)-L-asparaginase CG1827 n=54 Tax=Eumetazoa TaxID=6072 RepID=ASPG1_DROME ## UniRef50_Q8MR45 Putative N(4)-(beta-N-acetylglucosaminyl)-L-asparaginase CG1827 n=54 Tax=Eumetazoa TaxID=6072 RepID=ASPG1_DROME
TRINITY_DN17236_c0_g1	Met-R	Lab-S	4.31177e-07	2.60939e-05	15.253	3.725	2.171	0	0.402	0	No_annot
TRINITY_DN22129_c0_g1	Met-R	Lab-S	5.21145e-07	3.10363e-05	663.721	170.126	64.96	27.703	22.38	6.458	No_annot
TRINITY_DN25260_c0_g1	Met-R	Lab-S	5.34941e-07	3.17568e-05	2.302	2.72	4.805	0.069	0.188	0.312	UniRef50_UPI000947EA05 histone-lysine N-methyltransferase SETMAR-like n=1 Tax=Branchiostoma belcheri TaxID=7741 RepID=UPI000947EA05
TRINITY_DN27821_c1_g1	Met-R	Lab-S	5.53251e-07	3.27398e-05	2.915	7.278	8.024	0.653	0	0.446	UniRef50_V5I7Z7 UDP-glucuronosyltransferase (Fragment) n=2 Tax=Anoplophora glabripennis TaxID=217634 RepID=V5I7Z7_ANOGL
TRINITY_DN17648_c0_g1	Met-R	Lab-S	5.61129e-07	3.31013e-05	2.469	2.117	1.719	0	0	0	No_annot
TRINITY_DN15811_c0_g1	Met-R	Lab-S	5.7409e-07	3.3705e-05	8.417	19.646	11.199	2.986	1.669	2.48	No_annot
TRINITY_DN25392_c0_g4	Met-R	Lab-S	5.74967e-07	3.3705e-05	1.143	9.777	0.621	0.027	0	0.03	UniRef50_A0A0T6AWL2 Chaperone (Fragment) n=2 Tax=Holometabola TaxID=33392 RepID=A0A0T6AWL2_9SCAR
TRINITY_DN28295_c0_g2	Met-R	Lab-S	6.36887e-07	3.68709e-05	4.754	4.274	8.851	0.303	0.238	1.054	UniRef50_V5GWZ8 Retrovirus-related Pol polyprotein (Fragment) n=2 Tax=Cucujiformia TaxID=41088 RepID=V5GWZ8_ANOGL ## UniRef50_V5GWZ8 Retrovirus-related Pol polyprotein (Fragment) n=2 Tax=Cucujiformia TaxID=41088 RepID=V5GWZ8_ANOGL
TRINITY_DN28550_c2_g1	Met-R	Lab-S	6.3828e-07	3.68709e-05	83.216	102.829	92.864	10.215	0.281	1.144	UniRef50_UPI000C25401E orphan steroid hormone receptor 2-like n=1 Tax=Leptinotarsa decemlineata TaxID=7539 RepID=UPI000C25401E ## UniRef50_UPI000873922E orphan steroid hormone receptor 2-like isoform X2 n=1 Tax=Anoplophora glabripennis TaxID=217634 RepID=UPI000873922E ## UniRef50_UPI000873922E orphan steroid hormone receptor 2-like isoform X2 n=1 Tax=Anoplophora glabripennis TaxID=217634 RepID=UP…
TRINITY_DN18225_c0_g1	Met-R	Lab-S	6.41854e-07	3.68889e-05	1.697	2.62	2.008	0	0	0	UniRef50_UPI000994A7C1 fatty acid synthase-like n=2 Tax=Formicidae TaxID=36668 RepID=UPI000994A7C1
TRINITY_DN17392_c0_g1	Met-R	Lab-S	6.4309e-07	3.68889e-05	1.631	3.486	1.432	0	0	0	No_annot
TRINITY_DN24703_c7_g1	Met-R	Lab-S	6.57365e-07	3.74778e-05	51.833	86.296	115.12	15.823	16.543	23.165	UniRef50_P48153 40S ribosomal protein S3 n=57 Tax=cellular organisms TaxID=131567 RepID=RS3_MANSE ## UniRef50_P48153 40S ribosomal protein S3 n=57 Tax=cellular organisms TaxID=131567 RepID=RS3_MANSE ## UniRef50_P48153 40S ribosomal protein S3 n=57 Tax=cellular organisms TaxID=131567 RepID=RS3_MANSE ## UniRef50_A0A140LI77 40S ribosomal protein S3 n=5 Tax=Eukaryota TaxID=2759 RepID=A0A140LI77_MOUSE…
TRINITY_DN18888_c0_g1	Met-R	Lab-S	6.79478e-07	3.85207e-05	1.627	2.426	2.275	0	0	0	UniRef50_N6UPZ7 Uncharacterized protein (Fragment) n=5 Tax=Holometabola TaxID=33392 RepID=N6UPZ7_DENPD
TRINITY_DN17905_c0_g1	Met-R	Lab-S	7.17285e-07	4.04013e-05	1.498	3.089	4.742	0	0	0.262	UniRef50_E2C3Q1 Dynein heavy chain, cytoplasmic (Fragment) n=16 Tax=Eumetazoa TaxID=6072 RepID=E2C3Q1_HARSA
TRINITY_DN26289_c0_g2	Met-R	Lab-S	8.15544e-07	4.53889e-05	24.884	38.205	26.422	2.508	3.075	0	UniRef50_N6U4R0 Uncharacterized protein (Fragment) n=14 Tax=Pancrustacea TaxID=197562 RepID=N6U4R0_DENPD
TRINITY_DN16413_c0_g1	Met-R	Lab-S	9.88258e-07	5.38788e-05	1.038	1.424	4.363	0	0	0	No_annot
TRINITY_DN27852_c0_g6	Met-R	Lab-S	1.00092e-06	5.44103e-05	2.5	1.58	4.545	0.168	0.076	0.123	No_annot
TRINITY_DN27343_c0_g2	Met-R	Lab-S	1.0567e-06	5.71106e-05	0.594	2.453	3.928	0	0	0	No_annot
TRINITY_DN27653_c0_g2	Met-R	Lab-S	1.19176e-06	6.34927e-05	2.037	2.8	3.173	0.204	0.09	0	UniRef50_D6WK38 Zinc finger protein 568-like Protein n=8 Tax=Polyphaga TaxID=41084 RepID=D6WK38_TRICA
TRINITY_DN28974_c1_g1	Met-R	Lab-S	1.2418e-06	6.59708e-05	2.81	2.643	2.795	0.194	0.176	0.11	UniRef50_UPI00096B32DA LOW QUALITY PROTEIN: acylamino-acid-releasing enzyme-like n=1 Tax=Aethina tumida TaxID=116153 RepID=UPI00096B32DA
TRINITY_DN23975_c2_g1	Met-R	Lab-S	1.32433e-06	6.97604e-05	3.151	4.29	4.506	0	0.305	0.512	No_annot
TRINITY_DN25914_c0_g2	Met-R	Lab-S	1.36772e-06	7.18437e-05	3.24	2.067	1.516	0.029	0	0.031	UniRef50_A0A1W4WGX3 voltage-dependent calcium channel type A subunit alpha-1 isoform X2 n=15 Tax=Pancrustacea TaxID=197562 RepID=A0A1W4WGX3_AGRPL
TRINITY_DN30012_c4_g2	Met-R	Lab-S	1.41392e-06	7.38558e-05	542.614	86.488	37.899	8.434	13.164	0.852	No_annot
TRINITY_DN17631_c0_g1	Met-R	Lab-S	1.73753e-06	9.05065e-05	1.453	1.762	2.956	0	0	0	UniRef50_A0A139WGV9 Dedicator of cytokinesis protein 11-like Protein n=13 Tax=Neoptera TaxID=33340 RepID=A0A139WGV9_TRICA
TRINITY_DN28396_c0_g2	Met-R	Lab-S	2.19359e-06	0.000112693	6.245	11.366	3.555	0.792	0.587	1.292	No_annot
TRINITY_DN27768_c0_g1	Met-R	Lab-S	2.22962e-06	0.000113947	4.013	13.828	8.311	1.796	0.757	0.89	UniRef50_UPI0008F9BD4C glucose dehydrogenase [FAD, quinone]-like n=5 Tax=Neoptera TaxID=33340 RepID=UPI0008F9BD4C ## UniRef50_A0A088AQ51 Uncharacterized protein n=24 Tax=Hymenoptera TaxID=7399 RepID=A0A088AQ51_APIME ## UniRef50_A0A161M448 Glucose dehydrogenase (Fragment) n=1 Tax=Triatoma infestans TaxID=30076 RepID=A0A161M448_TRIIF
TRINITY_DN25010_c9_g4	Met-R	Lab-S	2.2302e-06	0.000113947	67.367	17.522	15.816	4	4.455	7.494	No_annot
TRINITY_DN29428_c0_g1	Met-R	Lab-S	2.30725e-06	0.000117243	41.107	23.925	25.051	3.686	0	1.768	UniRef50_O61227 Nuclear receptor n=9 Tax=Neoptera TaxID=33340 RepID=O61227_TENMO
TRINITY_DN17652_c0_g1	Met-R	Lab-S	2.39103e-06	0.000120844	1.888	2.375	1.772	0	0	0	No_annot
TRINITY_DN19527_c0_g1	Met-R	Lab-S	2.84997e-06	0.000142881	4.389	2.418	2.092	0	0.304	0	UniRef50_UPI000C200834 E3 ubiquitin-protein ligase SMURF1 isoform X2 n=2 Tax=Onthophagus taurus TaxID=166361 RepID=UPI000C200834 ## UniRef50_V5G4U9 E3 ubiquitin-protein ligase Smurf1 n=1 Tax=Anoplophora glabripennis TaxID=217634 RepID=V5G4U9_ANOGL
TRINITY_DN27584_c0_g5	Met-R	Lab-S	3.14361e-06	0.000156761	3.183	2.111	4.449	0.363	0	0.084	No_annot
TRINITY_DN26748_c0_g2	Met-R	Lab-S	3.2038e-06	0.000159338	3.44	2.686	4.304	0.254	0.478	0.299	UniRef50_A0A0T6AW63 Zinc finger protein (Fragment) n=1 Tax=Oryctes borbonicus TaxID=1629725 RepID=A0A0T6AW63_9SCAR
TRINITY_DN29475_c1_g7	Met-R	Lab-S	3.29211e-06	0.000163296	8.551	18.319	22.603	2.989	3.919	4.411	UniRef50_A0A226ELE3 Cytochrome P450 4C1 n=1 Tax=Folsomia candida TaxID=158441 RepID=A0A226ELE3_FOLCA ## UniRef50_A0A1I8ATA3 Uncharacterized protein n=2 Tax=Steinernema glaseri TaxID=37863 RepID=A0A1I8ATA3_9BILA ## UniRef50_A0A1I8ATA3 Uncharacterized protein n=2 Tax=Steinernema glaseri TaxID=37863 RepID=A0A1I8ATA3_9BILA
TRINITY_DN3401_c0_g1	Met-R	Lab-S	3.30642e-06	0.000163572	2.446	2.615	3.558	0	0.118	0.297	No_annot
TRINITY_DN28992_c3_g3	Met-R	Lab-S	3.41648e-06	0.00016857	16.021	24.066	23.728	1.883	0	0	UniRef50_W5JQJ8 Nuclear hormone receptor n=5 Tax=Anopheles TaxID=44484 RepID=W5JQJ8_ANODA
TRINITY_DN27341_c0_g2	Met-R	Lab-S	3.68634e-06	0.000181407	9.888	23.655	18.443	3.37	3.39	5.525	UniRef50_UPI00096B45EB fatty acyl-CoA reductase 1-like n=1 Tax=Aethina tumida TaxID=116153 RepID=UPI00096B45EB ## UniRef50_A0A026VRU3 Fatty acyl-CoA reductase (Fragment) n=3 Tax=Holometabola TaxID=33392 RepID=A0A026VRU3_OOCBI ## UniRef50_UPI00096B45EB fatty acyl-CoA reductase 1-like n=1 Tax=Aethina tumida TaxID=116153 RepID=UPI00096B45EB
TRINITY_DN26500_c0_g2	Met-R	Lab-S	3.74609e-06	0.000183863	5.275	2.279	1.535	0	0.185	0.231	UniRef50_UPI000B77BB4D uncharacterized protein LOC110674127 n=4 Tax=Aedes aegypti TaxID=7159 RepID=UPI000B77BB4D ## UniRef50_UPI000B77BB4D uncharacterized protein LOC110674127 n=4 Tax=Aedes aegypti TaxID=7159 RepID=UPI000B77BB4D ## UniRef50_UPI000B77BB4D uncharacterized protein LOC110674127 n=4 Tax=Aedes aegypti TaxID=7159 RepID=UPI000B77BB4D ## UniRef50_UPI000B77BB4D uncharacterized protein LOC1…
TRINITY_DN28002_c2_g1	Met-R	Lab-S	4.42625e-06	0.000214432	35.628	24.28	38.971	4.436	7.443	12.667	UniRef50_A0A0V1KMS7 Uncharacterized protein (Fragment) n=6 Tax=Trichinella TaxID=6333 RepID=A0A0V1KMS7_9BILA ## UniRef50_A0A1U7F2F5 Bm988 n=9 Tax=Protostomia TaxID=33317 RepID=A0A1U7F2F5_BRUMA ## UniRef50_D7GXS5 Uncharacterized protein n=3 Tax=Holometabola TaxID=33392 RepID=D7GXS5_TRICA ## UniRef50_A0A0J7KI76 Glutamyl-trna synthetase n=4 Tax=Lasius niger TaxID=67767 RepID=A0A0J7KI76_LASNI ## UniR…
TRINITY_DN20656_c0_g1	Met-R	Lab-S	4.59323e-06	0.000221947	14.361	31.342	57.805	6.44	3.749	9.431	UniRef50_T1E7E0 Putative heat shock 70 kDa protein n=27 Tax=cellular organisms TaxID=131567 RepID=T1E7E0_ANOAQ ## UniRef50_A0A1S3DPT0 heat shock 70 kDa protein cognate 1-like n=3 Tax=root TaxID=1 RepID=A0A1S3DPT0_DIACI
TRINITY_DN26295_c0_g3	Met-R	Lab-S	4.64413e-06	0.000223253	91.693	661.814	321.416	66.347	46.157	33.055	No_annot
TRINITY_DN18798_c0_g1	Met-R	Lab-S	4.69473e-06	0.000225106	3.02	3.348	5.144	0.25	0.186	0.699	UniRef50_UPI00096AEC17 LOW QUALITY PROTEIN: histone-lysine N-methyltransferase 2D-like n=1 Tax=Aethina tumida TaxID=116153 RepID=UPI00096AEC17
TRINITY_DN17586_c0_g1	Met-R	Lab-S	5.11747e-06	0.000244124	0.586	1.265	4.876	0	0	0	UniRef50_A0A1S4E9I6 acetyl-CoA carboxylase-like n=1 Tax=Diaphorina citri TaxID=121845 RepID=A0A1S4E9I6_DIACI
TRINITY_DN25326_c0_g1	Met-R	Lab-S	5.22032e-06	0.000247139	3.504	14.835	0.791	0	0.01	0.348	UniRef50_K7JGN9 Uncharacterized protein n=3 Tax=Nasonia vitripennis TaxID=7425 RepID=K7JGN9_NASVI
TRINITY_DN22131_c0_g1	Met-R	Lab-S	5.3023e-06	0.000249756	100.785	231.256	152.03	40.086	25.8	46.458	UniRef50_UPI00077DE4D5 muscle LIM protein 1 isoform X4 n=3 Tax=Neoptera TaxID=33340 RepID=UPI00077DE4D5 ## UniRef50_UPI00077DE4D5 muscle LIM protein 1 isoform X4 n=3 Tax=Neoptera TaxID=33340 RepID=UPI00077DE4D5 ## UniRef50_UPI00077DE4D5 muscle LIM protein 1 isoform X4 n=3 Tax=Neoptera TaxID=33340 RepID=UPI00077DE4D5 ## UniRef50_UPI00077DE4D5 muscle LIM protein 1 isoform X4 n=3 Tax=Neoptera TaxID=…
TRINITY_DN18184_c0_g1	Met-R	Lab-S	5.34657e-06	0.000251208	1.306	2.779	1.83	0	0	0	No_annot
TRINITY_DN15803_c0_g1	Met-R	Lab-S	5.37016e-06	0.000251684	107.494	0.765	99.473	1.521	3.486	2.135	No_annot
TRINITY_DN18797_c0_g1	Met-R	Lab-S	5.61423e-06	0.000262465	1.425	4.047	0.833	0	0	0	UniRef50_A0A1W4WMB6 unconventional myosin-Va n=6 Tax=Arthropoda TaxID=6656 RepID=A0A1W4WMB6_AGRPL
TRINITY_DN16163_c0_g1	Met-R	Lab-S	5.69261e-06	0.000264805	8.94	18.7	12.07	1.298	2.729	3.949	No_annot
TRINITY_DN25438_c0_g1	Met-R	Lab-S	5.87766e-06	0.00027206	2.871	2.057	2.09	0.04	0.053	0.183	UniRef50_A0A1Y1MHT3 Uncharacterized protein (Fragment) n=1 Tax=Photinus pyralis TaxID=7054 RepID=A0A1Y1MHT3_PHOPY ## UniRef50_A0A1Y1K319 Uncharacterized protein n=2 Tax=Photinus pyralis TaxID=7054 RepID=A0A1Y1K319_PHOPY ## UniRef50_A0A1Y1K319 Uncharacterized protein n=2 Tax=Photinus pyralis TaxID=7054 RepID=A0A1Y1K319_PHOPY ## UniRef50_A0A1Y1MHT3 Uncharacterized protein (Fragment) n=1 Tax=Photinu…
TRINITY_DN26725_c2_g5	Met-R	Lab-S	5.94543e-06	0.000274517	1.849	3.049	1.086	0	0	0	No_annot
TRINITY_DN23688_c0_g2	Met-R	Lab-S	5.992e-06	0.000275986	1.166	2.655	2.079	0	0	0	No_annot
TRINITY_DN27884_c1_g1	Met-R	Lab-S	6.42518e-06	0.000294488	2.656	2.335	3.013	0.154	0.311	0.178	UniRef50_UPI000C20A7F5 uncharacterized protein LOC111413455 n=1 Tax=Onthophagus taurus TaxID=166361 RepID=UPI000C20A7F5 ## UniRef50_UPI000C20A7F5 uncharacterized protein LOC111413455 n=1 Tax=Onthophagus taurus TaxID=166361 RepID=UPI000C20A7F5
TRINITY_DN18959_c0_g1	Met-R	Lab-S	6.62823e-06	0.000303051	3.424	1.218	1.335	0	0	0	UniRef50_A0A087ZN21 Uncharacterized protein n=70 Tax=Hymenoptera TaxID=7399 RepID=A0A087ZN21_APIME
TRINITY_DN16395_c0_g1	Met-R	Lab-S	7.23036e-06	0.000327379	0.239	5.771	1.375	0	0	0	No_annot
TRINITY_DN27503_c0_g1	Met-R	Lab-S	8.0738e-06	0.000362933	88.304	335.076	202.708	45.387	43.338	43.557	UniRef50_UPI00083C8614 serine protease 53-like n=1 Tax=Nicrophorus vespilloides TaxID=110193 RepID=UPI00083C8614 ## UniRef50_UPI000B36BAC1 uncharacterized protein LOC110373945 n=1 Tax=Helicoverpa armigera TaxID=29058 RepID=UPI000B36BAC1 ## UniRef50_UPI00083C8614 serine protease 53-like n=1 Tax=Nicrophorus vespilloides TaxID=110193 RepID=UPI00083C8614 ## UniRef50_UPI00083C8614 serine protease 53-l…
TRINITY_DN25391_c0_g1	Met-R	Lab-S	8.28264e-06	0.000370539	0.795	3.711	2.66	0	0.121	0	UniRef50_UPI000B77BB4D uncharacterized protein LOC110674127 n=4 Tax=Aedes aegypti TaxID=7159 RepID=UPI000B77BB4D ## UniRef50_UPI000B77BB4D uncharacterized protein LOC110674127 n=4 Tax=Aedes aegypti TaxID=7159 RepID=UPI000B77BB4D ## UniRef50_UPI000B77BB4D uncharacterized protein LOC110674127 n=4 Tax=Aedes aegypti TaxID=7159 RepID=UPI000B77BB4D ## UniRef50_UPI000B77BB4D uncharacterized protein LOC1…
TRINITY_DN38695_c0_g1	Met-R	Lab-S	8.42184e-06	0.000375867	10.609	8.888	8.839	1.728	2.976	0.87	No_annot
TRINITY_DN25992_c5_g5	Met-R	Lab-S	8.78678e-06	0.000391221	3.876	7.979	9.054	0	0.889	0	No_annot
TRINITY_DN16730_c0_g1	Met-R	Lab-S	9.05889e-06	0.000402378	1.848	1.972	1.729	0	0	0	UniRef50_D6WCW1 Vacuolar protein sorting-associated protein 13A-like Protein n=1 Tax=Tribolium castaneum TaxID=7070 RepID=D6WCW1_TRICA
TRINITY_DN24138_c0_g1	Met-R	Lab-S	9.17257e-06	0.000406462	1.413	22.671	0.113	0	0.08	0.118	UniRef50_UPI000C2536AE uncharacterized protein LOC111507223 n=1 Tax=Leptinotarsa decemlineata TaxID=7539 RepID=UPI000C2536AE
TRINITY_DN22859_c6_g1	Met-R	Lab-S	9.43777e-06	0.000417225	3.119	1.748	1.917	0.051	0.093	0.115	No_annot
TRINITY_DN29265_c0_g2	Met-R	Lab-S	1.02023e-05	0.000448165	2.526	2.345	0.931	0	0	0	UniRef50_UPI00087364F1 presequence protease, mitochondrial n=2 Tax=Polyphaga TaxID=41084 RepID=UPI00087364F1
TRINITY_DN26411_c2_g4	Met-R	Lab-S	1.03192e-05	0.00045192	191.321	404.434	666.15	94.051	101.412	41.706	No_annot
TRINITY_DN17553_c0_g1	Met-R	Lab-S	1.03527e-05	0.000452324	2.163	4.066	4.475	0	0.47	0	UniRef50_A0A1W4WNK6 disks large homolog 5-like n=7 Tax=Polyphaga TaxID=41084 RepID=A0A1W4WNK6_AGRPL
TRINITY_DN26946_c2_g1	Met-R	Lab-S	1.10577e-05	0.000478657	4.493	2.48	12.565	0.849	0.922	0.566	No_annot
TRINITY_DN25172_c0_g2	Met-R	Lab-S	1.20195e-05	0.000516699	2.064	1.109	2.435	0	0	0	UniRef50_A0A182NJQ5 Uncharacterized protein n=2 Tax=Cellia TaxID=44534 RepID=A0A182NJQ5_9DIPT
TRINITY_DN35669_c0_g1	Met-R	Lab-S	1.23047e-05	0.000527152	2.936	1.374	1.328	0	0	0	UniRef50_UPI00083BED3E tetratricopeptide repeat protein 21B-like isoform X1 n=2 Tax=Nicrophorus vespilloides TaxID=110193 RepID=UPI00083BED3E
TRINITY_DN25208_c2_g3	Met-R	Lab-S	1.2342e-05	0.000527152	10.192	5.642	7.153	1.066	2.003	1.659	No_annot
TRINITY_DN29055_c0_g1	Met-R	Lab-S	1.26179e-05	0.000533835	30.818	56.816	20.448	9.467	5.104	11.509	UniRef50_A0A1W4X457 ornithine aminotransferase, mitochondrial-like isoform X1 n=6 Tax=Bilateria TaxID=33213 RepID=A0A1W4X457_AGRPL ## UniRef50_A0A182YI01 Uncharacterized protein n=2 Tax=Anopheles TaxID=44484 RepID=A0A182YI01_ANOST ## UniRef50_P29758 Ornithine aminotransferase, mitochondrial n=215 Tax=cellular organisms TaxID=131567 RepID=OAT_MOUSE ## UniRef50_A0A0P5HRY0 Putative Ornithine aminotr…
TRINITY_DN28102_c1_g4	Met-R	Lab-S	1.26779e-05	0.000535164	3.045	9.04	10.127	1.386	1.254	1.103	No_annot
TRINITY_DN29641_c0_g1	Met-R	Lab-S	1.32479e-05	0.000557965	2.691	1.163	1.662	0	0	0	No_annot
TRINITY_DN20592_c0_g1	Met-R	Lab-S	1.34771e-05	0.000566339	3.83	2.818	3.712	0.089	0.081	0.608	No_annot
TRINITY_DN29428_c1_g1	Met-R	Lab-S	1.43125e-05	0.000597875	16.245	9.247	8.214	3.198	0.415	0.931	UniRef50_UPI000C25401E orphan steroid hormone receptor 2-like n=1 Tax=Leptinotarsa decemlineata TaxID=7539 RepID=UPI000C25401E ## UniRef50_UPI000873922E orphan steroid hormone receptor 2-like isoform X2 n=1 Tax=Anoplophora glabripennis TaxID=217634 RepID=UPI000873922E ## UniRef50_UPI000873922E orphan steroid hormone receptor 2-like isoform X2 n=1 Tax=Anoplophora glabripennis TaxID=217634 RepID=UP…
TRINITY_DN43761_c0_g1	Met-R	Lab-S	1.43234e-05	0.000597875	6.917	6.657	6.829	0.56	0	1.282	UniRef50_UPI00083BABD5 histone H2A deubiquitinase MYSM1-like n=1 Tax=Nicrophorus vespilloides TaxID=110193 RepID=UPI00083BABD5
TRINITY_DN16756_c0_g1	Met-R	Lab-S	1.4969e-05	0.000620667	2.111	0.642	3.161	0	0	0	UniRef50_A0A0T6B0K0 C1 domain containing protein n=1 Tax=Oryctes borbonicus TaxID=1629725 RepID=A0A0T6B0K0_9SCAR
TRINITY_DN18182_c0_g1	Met-R	Lab-S	1.7209e-05	0.00070883	2.099	1.437	1.752	0	0	0	No_annot
TRINITY_DN29497_c3_g5	Met-R	Lab-S	1.79065e-05	0.000732716	19.099	33.288	57.283	6.932	4.988	13.174	UniRef50_V5G270 Paxillin n=28 Tax=Eumetazoa TaxID=6072 RepID=V5G270_ANOGL
TRINITY_DN16845_c0_g1	Met-R	Lab-S	1.83481e-05	0.000749149	0.712	2.968	2.079	0	0	0	UniRef50_A0A0T6BH21 Uncharacterized protein (Fragment) n=1 Tax=Oryctes borbonicus TaxID=1629725 RepID=A0A0T6BH21_9SCAR
TRINITY_DN24889_c0_g1	Met-R	Lab-S	1.91451e-05	0.000779985	49.624	704.037	7.098	0.975	1.718	11.514	UniRef50_A0A219YXJ8 C-type lectin-S6 n=11 Tax=Hexapoda TaxID=6960 RepID=A0A219YXJ8_9NEOP ## UniRef50_A0A219YXJ8 C-type lectin-S6 n=11 Tax=Hexapoda TaxID=6960 RepID=A0A219YXJ8_9NEOP ## UniRef50_W5JJD6 Uncharacterized protein n=3 Tax=Holometabola TaxID=33392 RepID=W5JJD6_ANODA ## UniRef50_UPI0007D98783 perlucin-like protein isoform X1 n=7 Tax=Neoptera TaxID=33340 RepID=UPI0007D98783 ## UniRef50_A0A…
TRINITY_DN16778_c0_g1	Met-R	Lab-S	1.96886e-05	0.00079865	29.208	21.559	28.572	2.519	0	0	UniRef50_A0A1Y1NDF2 Uncharacterized protein (Fragment) n=1 Tax=Photinus pyralis TaxID=7054 RepID=A0A1Y1NDF2_PHOPY
TRINITY_DN29229_c1_g3	Met-R	Lab-S	2.10044e-05	0.000845286	2.768	2.239	2.357	0.144	0.236	0.162	No_annot
TRINITY_DN26400_c3_g2	Met-R	Lab-S	2.10423e-05	0.000845286	6.806	4.423	8.47	1.277	1.172	1.571	UniRef50_A0A2A4JHT5 Uncharacterized protein n=2 Tax=Eumetazoa TaxID=6072 RepID=A0A2A4JHT5_HELVI ## UniRef50_A0A2A4JHT5 Uncharacterized protein n=2 Tax=Eumetazoa TaxID=6072 RepID=A0A2A4JHT5_HELVI ## UniRef50_A0A2H1V203 SFRICE_007735 (Fragment) n=1 Tax=Spodoptera frugiperda TaxID=7108 RepID=A0A2H1V203_SPOFR ## UniRef50_A0A2H1V203 SFRICE_007735 (Fragment) n=1 Tax=Spodoptera frugiperda TaxID=7108 Rep…
TRINITY_DN18140_c0_g1	Met-R	Lab-S	2.10643e-05	0.000845286	3.829	5.879	3.161	0.53	0	0.601	UniRef50_UPI000B986E37 Golgi-specific brefeldin A-resistance guanine nucleotide exchange factor 1-like n=2 Tax=Nilaparvata lugens TaxID=108931 RepID=UPI000B986E37
TRINITY_DN27864_c0_g2	Met-R	Lab-S	2.17202e-05	0.000866769	3.114	2.536	4.039	0.348	0.443	0.408	UniRef50_UPI000767DBF9 uncharacterized protein LOC107195130 n=1 Tax=Dufourea novaeangliae TaxID=178035 RepID=UPI000767DBF9
TRINITY_DN17320_c0_g1	Met-R	Lab-S	2.17388e-05	0.000866769	6.303	6.123	7.669	1.373	1.185	1.916	UniRef50_A0A1W4X7F5 uncharacterized protein LOC108739104 isoform X1 n=5 Tax=Agrilus planipennis TaxID=224129 RepID=A0A1W4X7F5_AGRPL ## UniRef50_A0A1W4X7F5 uncharacterized protein LOC108739104 isoform X1 n=5 Tax=Agrilus planipennis TaxID=224129 RepID=A0A1W4X7F5_AGRPL
TRINITY_DN18198_c0_g1	Met-R	Lab-S	2.30096e-05	0.000909681	2.447	0.434	5.538	0.167	0	0	UniRef50_A0A139WK59 Ankyrin-2-like Protein n=16 Tax=Pancrustacea TaxID=197562 RepID=A0A139WK59_TRICA ## UniRef50_A0A139WK59 Ankyrin-2-like Protein n=16 Tax=Pancrustacea TaxID=197562 RepID=A0A139WK59_TRICA
TRINITY_DN19297_c1_g1	Met-R	Lab-S	2.32757e-05	0.000914403	1.106	2.973	1.309	0	0	0	No_annot
TRINITY_DN15988_c0_g1	Met-R	Lab-S	2.36698e-05	0.000924061	1.68	0.9	2.955	0	0	0	UniRef50_UPI00077DC8B7 neogenin isoform X4 n=3 Tax=Cucujiformia TaxID=41088 RepID=UPI00077DC8B7
TRINITY_DN28217_c0_g3	Met-R	Lab-S	2.55541e-05	0.000992999	2.442	1.206	1.549	0	0	0	No_annot

## Sheet: Down-regulated in Met-R
					Transcription level (TMM)
	sampleA	sampleB	PValue	FDR	Met-R_1	Met-R_2	Met-R_3	Lab-S_1	Lab-S_2	Lab-S_3	Annotation
TRINITY_DN22061_c1_g1	Met-R	Lab-S	1.08198e-36	2.52912e-33	3.671	2.386	0.657	1298.73	1318.91	1672.07	UniRef50_T1J7D8 Uncharacterized protein n=3 Tax=Metazoa TaxID=33208 RepID=T1J7D8_STRMM
TRINITY_DN28727_c8_g2	Met-R	Lab-S	1.69912e-31	2.8885e-28	1.408	1.36	2.898	185.829	136.308	238.145	UniRef50_A0A093HMG8 Fructose-bisphosphate aldolase (Fragment) n=3 Tax=Eukaryota TaxID=2759 RepID=A0A093HMG8_GAVST
TRINITY_DN986_c0_g1	Met-R	Lab-S	3.09685e-31	4.45469e-28	0.005	0	0	15.131	11.188	26.67	No_annot
TRINITY_DN30819_c0_g1	Met-R	Lab-S	2.00455e-29	2.34282e-26	0.507	1.62	0.797	59.754	44.893	64.169	No_annot
TRINITY_DN29106_c0_g3	Met-R	Lab-S	1.59979e-23	1.15062e-20	0	0	0	9.368	6.583	16.454	UniRef50_A0A1Y1K4X7 Uncharacterized protein (Fragment) n=4 Tax=Bilateria TaxID=33213 RepID=A0A1Y1K4X7_PHOPY
TRINITY_DN24349_c1_g2	Met-R	Lab-S	1.79334e-22	1.19769e-19	1.1	0.423	0.354	20.073	17.905	23.756	No_annot
TRINITY_DN16282_c0_g1	Met-R	Lab-S	3.07934e-21	1.69364e-18	0	0	0	6.202	6.96	11.981	UniRef50_A0A1B6GBS3 Uncharacterized protein (Fragment) n=1 Tax=Cuerna arida TaxID=1464854 RepID=A0A1B6GBS3_9HEMI
TRINITY_DN17660_c0_g1	Met-R	Lab-S	8.42547e-21	4.50161e-18	0	0	0	4.713	15.044	38.278	UniRef50_UPI000C253AEB titin-like isoform X1 n=10 Tax=Leptinotarsa decemlineata TaxID=7539 RepID=UPI000C253AEB
TRINITY_DN26249_c0_g1	Met-R	Lab-S	1.45125e-20	7.33471e-18	0.329	0.306	0.171	13.489	9.166	17.527	No_annot
TRINITY_DN17736_c0_g1	Met-R	Lab-S	7.4744e-20	3.49428e-17	0	0	0	8.414	10.873	4.528	No_annot
TRINITY_DN17059_c0_g1	Met-R	Lab-S	2.78262e-19	1.18261e-16	0	0	0.461	12.549	14.453	13.893	UniRef50_A0A170YD18 Spectrin beta chain isoform x1 (Fragment) n=1 Tax=Triatoma infestans TaxID=30076 RepID=A0A170YD18_TRIIF
TRINITY_DN19345_c0_g2	Met-R	Lab-S	6.3717e-19	2.59023e-16	0.095	0	0	9.054	11.213	5.099	No_annot
TRINITY_DN25274_c0_g1	Met-R	Lab-S	7.36114e-18	2.80925e-15	1.572	3.583	0.306	143.836	86.471	140.715	UniRef50_H3B003 Collagen type VI alpha 3 chain n=1 Tax=Latimeria chalumnae TaxID=7897 RepID=H3B003_LATCH ## UniRef50_UPI00037E0E16 collagen-like protein n=1 Tax=Kaistia granuli TaxID=363259 RepID=UPI00037E0E16 ## UniRef50_T0MCC0 Collagen alpha-1(VII) chain n=2 Tax=Camelus ferus TaxID=419612 RepID=T0MCC0_CAMFR
TRINITY_DN18980_c0_g2	Met-R	Lab-S	3.2257e-17	1.18276e-14	0	0	0	3.778	5.952	9.682	UniRef50_A0A0L7LGM0 Uncharacterized protein (Fragment) n=1 Tax=Operophtera brumata TaxID=104452 RepID=A0A0L7LGM0_9NEOP
TRINITY_DN20738_c0_g1	Met-R	Lab-S	3.92118e-17	1.38351e-14	0.979	0.831	0.942	24.476	11.354	16.007	UniRef50_UPI000C1FDC71 glutathione S-transferase 1-1-like n=1 Tax=Onthophagus taurus TaxID=166361 RepID=UPI000C1FDC71 ## UniRef50_A0A1W4X757 glutathione S-transferase D7-like n=1 Tax=Agrilus planipennis TaxID=224129 RepID=A0A1W4X757_AGRPL
TRINITY_DN32854_c0_g1	Met-R	Lab-S	5.74582e-17	1.98976e-14	0.535	0.155	0.132	20.771	13.555	7.473	UniRef50_A0A1W4XV87 fatty acid synthase-like n=3 Tax=Polyphaga TaxID=41084 RepID=A0A1W4XV87_AGRPL
TRINITY_DN25319_c0_g5	Met-R	Lab-S	9.49616e-17	3.0098e-14	0	0.068	0	9.204	5.302	4.66	No_annot
TRINITY_DN19702_c0_g1	Met-R	Lab-S	1.05807e-16	3.29765e-14	0	0	0	5.277	3.755	12.691	No_annot
TRINITY_DN18944_c0_g1	Met-R	Lab-S	1.45415e-16	4.31628e-14	0	0	0	7.084	8.875	3.073	No_annot
TRINITY_DN18302_c0_g1	Met-R	Lab-S	5.91398e-16	1.57988e-13	0	0	0	5.448	4.262	4.568	UniRef50_A0A1G3PIY1 Uncharacterized protein n=1 Tax=Spirochaetes bacterium GWF1_51_8 TaxID=1802190 RepID=A0A1G3PIY1_9SPIR
TRINITY_DN18066_c0_g1	Met-R	Lab-S	1.07144e-15	2.82196e-13	0	0	0	6.938	2.838	7.159	No_annot
TRINITY_DN22014_c0_g1	Met-R	Lab-S	1.13471e-15	2.9471e-13	12.964	13.223	15.218	176.087	119.428	234.819	UniRef50_A0A194QLJ1 Troponin C, isoform 1 n=4 Tax=Papilio TaxID=7145 RepID=A0A194QLJ1_PAPMA ## UniRef50_A0A088A1V5 Uncharacterized protein n=27 Tax=Pancrustacea TaxID=197562 RepID=A0A088A1V5_APIME ## UniRef50_A0A088A1V5 Uncharacterized protein n=27 Tax=Pancrustacea TaxID=197562 RepID=A0A088A1V5_APIME ## UniRef50_P47949 Troponin C, isoform 3 n=109 Tax=Neoptera TaxID=33340 RepID=TNNC3_DROME ## UniR…
TRINITY_DN25401_c1_g5	Met-R	Lab-S	1.15667e-15	2.96299e-13	0.584	0.931	0.34	14.784	12.703	10.481	No_annot
TRINITY_DN19837_c0_g2	Met-R	Lab-S	1.81465e-15	4.52452e-13	0	0	0	5.422	7.835	2.898	No_annot
TRINITY_DN29098_c0_g2	Met-R	Lab-S	2.71415e-15	6.67824e-13	4.75	10.559	10.158	99.3	125.783	213.133	No_annot
TRINITY_DN22015_c4_g1	Met-R	Lab-S	2.80809e-15	6.81966e-13	18.164	15.508	17.729	223.699	151.677	172.848	UniRef50_UPI00096B3915 pathogenesis-related protein 5-like n=1 Tax=Aethina tumida TaxID=116153 RepID=UPI00096B3915 ## UniRef50_UPI000873ADCC pathogenesis-related protein 5-like n=1 Tax=Anoplophora glabripennis TaxID=217634 RepID=UPI000873ADCC ## UniRef50_UPI000873ADCC pathogenesis-related protein 5-like n=1 Tax=Anoplophora glabripennis TaxID=217634 RepID=UPI000873ADCC ## UniRef50_UPI00083C2712 pa…
TRINITY_DN22015_c4_g2	Met-R	Lab-S	9.85337e-15	2.24705e-12	198.713	136.873	197.082	2721.95	1787.51	2291.88	UniRef50_UPI000C254F5F pathogenesis-related protein 5-like n=1 Tax=Leptinotarsa decemlineata TaxID=7539 RepID=UPI000C254F5F ## UniRef50_D6W9V8 Pathogenesis-related protein 5-like Protein n=8 Tax=Polyphaga TaxID=41084 RepID=D6W9V8_TRICA
TRINITY_DN27201_c17_g1	Met-R	Lab-S	1.31924e-14	2.97226e-12	0	0.249	0	8.057	4.662	10.227	UniRef50_P23380 V-type proton ATPase 16 kDa proteolipid subunit n=454 Tax=cellular organisms TaxID=131567 RepID=VATL_DROME
TRINITY_DN27385_c1_g1	Met-R	Lab-S	2.2969e-14	4.88092e-12	0.44	0.628	0.695	9.224	8.883	13.045	UniRef50_A0A0X8VWL7 Odorant-binding protein 11 n=1 Tax=Rhyzopertha dominica TaxID=92692 RepID=A0A0X8VWL7_RHYDO
TRINITY_DN18638_c0_g1	Met-R	Lab-S	4.19993e-14	8.72652e-12	3.312	2.117	2.702	18.79	23.01	27.315	UniRef50_A0A1Y1LZK0 Uncharacterized protein n=14 Tax=Bilateria TaxID=33213 RepID=A0A1Y1LZK0_PHOPY
TRINITY_DN17983_c0_g1	Met-R	Lab-S	8.34547e-14	1.67807e-11	5.613	2.194	4.814	43	42.695	35.447	UniRef50_N6TIV2 Uncharacterized protein (Fragment) n=2 Tax=Dendroctonus ponderosae TaxID=77166 RepID=N6TIV2_DENPD
TRINITY_DN16671_c0_g1	Met-R	Lab-S	4.38544e-13	7.96191e-11	0	0	0	1.987	5.894	5.086	UniRef50_A0A1Y1N255 Uncharacterized protein n=1 Tax=Photinus pyralis TaxID=7054 RepID=A0A1Y1N255_PHOPY
TRINITY_DN26493_c0_g2	Met-R	Lab-S	4.96679e-13	8.93067e-11	0	0	0	2.964	5.531	3.181	No_annot
TRINITY_DN22894_c3_g3	Met-R	Lab-S	5.63939e-13	9.94874e-11	0	0	0	5.271	3.361	2.835	No_annot
TRINITY_DN30005_c1_g1	Met-R	Lab-S	1.26509e-12	2.11225e-10	5.107	1.022	2.938	43.426	36.586	36.706	No_annot
TRINITY_DN4607_c0_g1	Met-R	Lab-S	1.6545e-12	2.73797e-10	0	0	0	2.409	3.331	5.783	UniRef50_Q92AC1 Lin2001 protein n=9 Tax=Listeria TaxID=1637 RepID=Q92AC1_LISIN
TRINITY_DN16321_c0_g1	Met-R	Lab-S	2.1502e-12	3.49642e-10	0	0	0	2.148	5.777	3.654	No_annot
TRINITY_DN25966_c17_g1	Met-R	Lab-S	3.13001e-12	4.98767e-10	0	0.369	0.404	6.667	12.948	6.476	UniRef50_A0A1B0EZ45 Uncharacterized protein n=3 Tax=Bilateria TaxID=33213 RepID=A0A1B0EZ45_PHLPP
TRINITY_DN23503_c0_g1	Met-R	Lab-S	3.3162e-12	5.21116e-10	33.362	46.024	66.251	493.105	552.336	376.285	No_annot
TRINITY_DN17080_c0_g1	Met-R	Lab-S	9.37456e-12	1.38035e-09	0	0	0	2.148	4.333	3.654	UniRef50_UPI00094EA35A probable ubiquitin carboxyl-terminal hydrolase FAF-X n=1 Tax=Dendroctonus ponderosae TaxID=77166 RepID=UPI00094EA35A
TRINITY_DN27959_c9_g1	Met-R	Lab-S	1.02889e-11	1.49149e-09	2.986	0.908	1.747	42.543	21.016	14.16	No_annot
TRINITY_DN29665_c20_g8	Met-R	Lab-S	1.26703e-11	1.80753e-09	9.368	12.923	26.837	156.242	173.222	171.088	UniRef50_A0A2A4AZV6 Uncharacterized protein (Fragment) n=1 Tax=Pseudomonas pelagia TaxID=553151 RepID=A0A2A4AZV6_9PSED
TRINITY_DN17636_c0_g1	Met-R	Lab-S	1.66675e-11	2.30876e-09	0	0	0	1.807	4.477	4.261	UniRef50_A0A1X9IW38 Strawberry notch isoform X1 n=1 Tax=Harmonia axyridis TaxID=115357 RepID=A0A1X9IW38_HARAX
TRINITY_DN22015_c4_g3	Met-R	Lab-S	1.72226e-11	2.33792e-09	983.466	786.739	1116.68	9974.64	6699.07	8066.28	UniRef50_Q4F6N5 Thaumatin-like protein 2 n=1 Tax=Dendroides canadensis TaxID=55100 RepID=Q4F6N5_9CUCU
TRINITY_DN23867_c0_g1	Met-R	Lab-S	1.72531e-11	2.33792e-09	0.323	0.239	0.197	7.13	5.879	4.73	UniRef50_H9JME3 Uncharacterized protein n=2 Tax=Bombyx mori TaxID=7091 RepID=H9JME3_BOMMO
TRINITY_DN18004_c0_g1	Met-R	Lab-S	2.1279e-11	2.86271e-09	0	0	0	3.849	2.254	3.414	No_annot
TRINITY_DN17772_c0_g1	Met-R	Lab-S	2.75634e-11	3.62983e-09	0.03	0.016	0	4.145	4.147	2.368	UniRef50_UPI000C203F24 piggyBac transposable element-derived protein 4-like n=2 Tax=Onthophagus taurus TaxID=166361 RepID=UPI000C203F24
TRINITY_DN28137_c0_g2	Met-R	Lab-S	3.14331e-11	4.05378e-09	0	0	0	2.088	3.113	4.501	UniRef50_UPI000C20905B tetratricopeptide repeat protein 28 n=2 Tax=Polyphaga TaxID=41084 RepID=UPI000C20905B
TRINITY_DN25635_c1_g1	Met-R	Lab-S	3.28857e-11	4.18342e-09	3.53	0.626	1.714	35.536	17.34	24.509	No_annot
TRINITY_DN17627_c0_g1	Met-R	Lab-S	3.88145e-11	4.90426e-09	1.044	1.711	1.849	9.101	16.366	18.975	UniRef50_A0A1A9ZFY2 Uncharacterized protein n=1 Tax=Glossina pallidipes TaxID=7398 RepID=A0A1A9ZFY2_GLOPL
TRINITY_DN30064_c3_g1	Met-R	Lab-S	4.17797e-11	5.24349e-09	0	0	0	2.85	3.859	2.443	No_annot
TRINITY_DN24991_c0_g1	Met-R	Lab-S	5.47646e-11	6.82732e-09	0	0	0	4.402	3.149	1.973	No_annot
TRINITY_DN16926_c0_g1	Met-R	Lab-S	5.97168e-11	7.3954e-09	0	0	0	2.314	2.615	4.299	No_annot
TRINITY_DN18919_c0_g1	Met-R	Lab-S	6.46427e-11	7.92464e-09	0	0	0	3.235	5.819	1.581	UniRef50_UPI00083C169B inverted formin-2 n=1 Tax=Nicrophorus vespilloides TaxID=110193 RepID=UPI00083C169B
TRINITY_DN29895_c1_g1	Met-R	Lab-S	6.4838e-11	7.92464e-09	41.789	49.983	38.921	616.345	249.758	340.152	UniRef50_A0A0N0PE88 Uncharacterized protein n=6 Tax=Obtectomera TaxID=104431 RepID=A0A0N0PE88_PAPMA ## UniRef50_UPI000C253344 uncharacterized protein LOC111516059 n=1 Tax=Leptinotarsa decemlineata TaxID=7539 RepID=UPI000C253344 ## UniRef50_A0A0N0PE88 Uncharacterized protein n=6 Tax=Obtectomera TaxID=104431 RepID=A0A0N0PE88_PAPMA ## UniRef50_A0A0N0PE88 Uncharacterized protein n=6 Tax=Obtectomera T…
TRINITY_DN16882_c0_g1	Met-R	Lab-S	9.01295e-11	1.08737e-08	0	0	0	6.306	7.246	0.801	No_annot
TRINITY_DN22015_c13_g1	Met-R	Lab-S	1.06393e-10	1.25921e-08	0.475	0.759	0.278	8.851	5.962	8.041	UniRef50_D6W9V8 Pathogenesis-related protein 5-like Protein n=8 Tax=Polyphaga TaxID=41084 RepID=D6W9V8_TRICA
TRINITY_DN25555_c2_g1	Met-R	Lab-S	1.2234e-10	1.43884e-08	0.196	0	0	4.132	4.228	4.037	No_annot
TRINITY_DN29665_c20_g1	Met-R	Lab-S	1.25866e-10	1.47106e-08	19.752	103.054	105.807	1083.49	1171.51	1304.09	UniRef50_A0A154P3Q8 Elongation factor 2 n=93 Tax=Bilateria TaxID=33213 RepID=A0A154P3Q8_9HYME
TRINITY_DN20941_c0_g1	Met-R	Lab-S	1.87488e-10	2.13782e-08	0.608	0.576	0.708	8.727	6.982	6.869	UniRef50_D6WL86 Ubiquitin-conjugating enzyme E2-17 kDa-like Protein n=3 Tax=Bilateria TaxID=33213 RepID=D6WL86_TRICA ## UniRef50_B7QCT3 Ubiquitin-conjugating enzyme, putative n=1 Tax=Ixodes scapularis TaxID=6945 RepID=B7QCT3_IXOSC
TRINITY_DN18631_c0_g1	Met-R	Lab-S	2.00093e-10	2.26772e-08	0.42	0.45	0.985	6.904	7.687	10.417	UniRef50_A0A0P5DGX3 Spectrin alpha chain, non-erythrocytic n=4 Tax=Daphnia magna TaxID=35525 RepID=A0A0P5DGX3_9CRUS
TRINITY_DN29898_c2_g5	Met-R	Lab-S	2.12895e-10	2.38844e-08	0	0	0	4.326	3.427	1.547	No_annot
TRINITY_DN29234_c5_g3	Met-R	Lab-S	2.20799e-10	2.45771e-08	0	0	0.053	2.441	3.597	3.284	No_annot
TRINITY_DN18388_c0_g1	Met-R	Lab-S	2.76735e-10	3.02629e-08	2.114	0.305	0.693	10.332	27.606	16.031	UniRef50_A0A1Y1JW55 Uncharacterized protein n=5 Tax=Photinus pyralis TaxID=7054 RepID=A0A1Y1JW55_PHOPY
TRINITY_DN27214_c1_g4	Met-R	Lab-S	3.74238e-10	4.0001e-08	0.516	0.111	3.591	41.184	57.296	123.49	No_annot
TRINITY_DN18321_c0_g1	Met-R	Lab-S	5.31669e-10	5.58551e-08	0	0	0	2.237	1.518	7.033	No_annot
TRINITY_DN17899_c0_g1	Met-R	Lab-S	7.43111e-10	7.51145e-08	0	0	0	2.227	4.482	1.89	UniRef50_UPI0008759165 uncharacterized protein LOC108911024 n=2 Tax=Chrysomeloidea TaxID=71528 RepID=UPI0008759165
TRINITY_DN26009_c4_g3	Met-R	Lab-S	9.53634e-10	9.48561e-08	8.767	17.075	14.138	80.843	80.606	75.237	UniRef50_E5A5U3 Similar to trypsin-like protease 1 n=15 Tax=leotiomyceta TaxID=716546 RepID=E5A5U3_LEPMJ
TRINITY_DN18170_c0_g1	Met-R	Lab-S	1.01172e-09	1.00101e-07	0.386	0	0	7.172	3.833	6.084	UniRef50_UPI000C251F51 low-density lipoprotein receptor-related protein 4 n=1 Tax=Leptinotarsa decemlineata TaxID=7539 RepID=UPI000C251F51
TRINITY_DN26738_c11_g5	Met-R	Lab-S	1.28157e-09	1.25473e-07	4.263	4.937	11.65	141.184	49.377	47.501	UniRef50_A0A0K8URS6 60S ribosomal protein L3 (Fragment) n=7 Tax=Bilateria TaxID=33213 RepID=A0A0K8URS6_BACLA
TRINITY_DN28062_c0_g1	Met-R	Lab-S	1.38711e-09	1.34398e-07	0	0	0	1.889	10.203	1.076	UniRef50_UPI000C251999 neurotactin n=2 Tax=Polyphaga TaxID=41084 RepID=UPI000C251999
TRINITY_DN23131_c0_g1	Met-R	Lab-S	1.48343e-09	1.42257e-07	1.306	5.863	3.707	32.435	21.799	33.156	UniRef50_A0A1W4XBF7 regucalcin-like isoform X1 n=8 Tax=Polyphaga TaxID=41084 RepID=A0A1W4XBF7_AGRPL ## UniRef50_A0A1W4XBF7 regucalcin-like isoform X1 n=8 Tax=Polyphaga TaxID=41084 RepID=A0A1W4XBF7_AGRPL ## UniRef50_A0A1W4XBF7 regucalcin-like isoform X1 n=8 Tax=Polyphaga TaxID=41084 RepID=A0A1W4XBF7_AGRPL ## UniRef50_A0A1W4XBF7 regucalcin-like isoform X1 n=8 Tax=Polyphaga TaxID=41084 RepID=A0A1W4X…
TRINITY_DN17666_c0_g1	Met-R	Lab-S	1.80292e-09	1.72014e-07	0	0	0	3.381	4.719	1.054	UniRef50_UPI0008759165 uncharacterized protein LOC108911024 n=2 Tax=Chrysomeloidea TaxID=71528 RepID=UPI0008759165
TRINITY_DN26564_c3_g1	Met-R	Lab-S	1.86717e-09	1.76344e-07	14.156	15.71	13.664	73.137	62.699	100.833	UniRef50_A0A232F754 Uncharacterized protein n=1 Tax=Trichomalopsis sarcophagae TaxID=543379 RepID=A0A232F754_9HYME ## UniRef50_P19889 60S acidic ribosomal protein P0 n=566 Tax=cellular organisms TaxID=131567 RepID=RLA0_DROME ## UniRef50_P19889 60S acidic ribosomal protein P0 n=566 Tax=cellular organisms TaxID=131567 RepID=RLA0_DROME ## UniRef50_A0A232F754 Uncharacterized protein n=1 Tax=Trichomal…
TRINITY_DN19601_c0_g1	Met-R	Lab-S	2.7205e-09	2.53101e-07	0.084	0.037	0.105	2.304	7.559	2.984	UniRef50_A0A1W4XV87 fatty acid synthase-like n=3 Tax=Polyphaga TaxID=41084 RepID=A0A1W4XV87_AGRPL
TRINITY_DN12938_c0_g1	Met-R	Lab-S	2.92273e-09	2.70569e-07	0	0	0	2.899	0.869	6.608	UniRef50_A0A1Y1KTV5 Uncharacterized protein (Fragment) n=1 Tax=Photinus pyralis TaxID=7054 RepID=A0A1Y1KTV5_PHOPY ## UniRef50_A0A1Y1KTV5 Uncharacterized protein (Fragment) n=1 Tax=Photinus pyralis TaxID=7054 RepID=A0A1Y1KTV5_PHOPY
TRINITY_DN19046_c0_g1	Met-R	Lab-S	3.03865e-09	2.79915e-07	0.791	2.114	0.463	11.834	9.302	14.389	UniRef50_A0A0T6BHP0 Uncharacterized protein (Fragment) n=1 Tax=Oryctes borbonicus TaxID=1629725 RepID=A0A0T6BHP0_9SCAR
TRINITY_DN16747_c0_g1	Met-R	Lab-S	3.72991e-09	3.33729e-07	0	0	0.704	6.868	7.259	13.506	UniRef50_A0A1B6GBS3 Uncharacterized protein (Fragment) n=1 Tax=Cuerna arida TaxID=1464854 RepID=A0A1B6GBS3_9HEMI
TRINITY_DN22824_c0_g2	Met-R	Lab-S	3.77068e-09	3.34525e-07	1.631	1.14	1.441	9.335	9.793	9.997	UniRef50_UPI000C2536EF protein argonaute-2-like n=1 Tax=Leptinotarsa decemlineata TaxID=7539 RepID=UPI000C2536EF ## UniRef50_UPI000C25397A protein argonaute-2-like isoform X1 n=4 Tax=Leptinotarsa decemlineata TaxID=7539 RepID=UPI000C25397A ## UniRef50_A0A0H4TJG6 Ago2a protein (Fragment) n=5 Tax=Cucujiformia TaxID=41088 RepID=A0A0H4TJG6_LEPDE
TRINITY_DN22708_c0_g1	Met-R	Lab-S	3.77458e-09	3.34525e-07	0.132	0.014	0.083	5.014	2.965	2.532	UniRef50_A0A139WMI6 Uncharacterized protein n=1 Tax=Tribolium castaneum TaxID=7070 RepID=A0A139WMI6_TRICA ## UniRef50_A0A139WMI6 Uncharacterized protein n=1 Tax=Tribolium castaneum TaxID=7070 RepID=A0A139WMI6_TRICA
TRINITY_DN18176_c0_g1	Met-R	Lab-S	5.94556e-09	5.14731e-07	0	0	0	1.873	2.036	3.847	UniRef50_A0A1W4XDK5 uncharacterized protein LOC108740636 n=1 Tax=Agrilus planipennis TaxID=224129 RepID=A0A1W4XDK5_AGRPL
TRINITY_DN29127_c0_g1	Met-R	Lab-S	6.81921e-09	5.8228e-07	0.195	0.124	0.07	5.823	2.801	2.86	UniRef50_UPI000C2541ED protein crumbs n=1 Tax=Leptinotarsa decemlineata TaxID=7539 RepID=UPI000C2541ED ## UniRef50_UPI000C2541ED protein crumbs n=1 Tax=Leptinotarsa decemlineata TaxID=7539 RepID=UPI000C2541ED
TRINITY_DN27016_c2_g3	Met-R	Lab-S	7.50332e-09	6.37783e-07	0.519	0.931	0.352	8.389	9.357	4.494	No_annot
TRINITY_DN26089_c1_g1	Met-R	Lab-S	8.23231e-09	6.94741e-07	1.753	1.209	0.908	6.095	14.681	12.282	UniRef50_D6WVU0 Regulator of microtubule dynamics protein 1-like Protein n=1 Tax=Tribolium castaneum TaxID=7070 RepID=D6WVU0_TRICA ## UniRef50_D6WVU0 Regulator of microtubule dynamics protein 1-like Protein n=1 Tax=Tribolium castaneum TaxID=7070 RepID=D6WVU0_TRICA ## UniRef50_D6WVU0 Regulator of microtubule dynamics protein 1-like Protein n=1 Tax=Tribolium castaneum TaxID=7070 RepID=D6WVU0_TRICA …
TRINITY_DN28733_c0_g4	Met-R	Lab-S	8.49204e-09	7.12112e-07	0	0	0	3.695	2.39	1.51	No_annot
TRINITY_DN21079_c0_g1	Met-R	Lab-S	1.02383e-08	8.47149e-07	1.794	1.175	1.238	16.37	8.16	8.425	UniRef50_A0A139WMH8 Uncharacterized protein n=4 Tax=Tribolium castaneum TaxID=7070 RepID=A0A139WMH8_TRICA ## UniRef50_A0A139WMH8 Uncharacterized protein n=4 Tax=Tribolium castaneum TaxID=7070 RepID=A0A139WMH8_TRICA ## UniRef50_A0A139WMH8 Uncharacterized protein n=4 Tax=Tribolium castaneum TaxID=7070 RepID=A0A139WMH8_TRICA ## UniRef50_A0A139WMH8 Uncharacterized protein n=4 Tax=Tribolium castaneum …
TRINITY_DN21249_c0_g1	Met-R	Lab-S	1.06341e-08	8.76026e-07	1.376	2.565	1.312	12.276	35.728	7.926	UniRef50_UPI000C2003CE chitinase-3-like protein 1 n=1 Tax=Onthophagus taurus TaxID=166361 RepID=UPI000C2003CE ## UniRef50_UPI000C2003CE chitinase-3-like protein 1 n=1 Tax=Onthophagus taurus TaxID=166361 RepID=UPI000C2003CE
TRINITY_DN20770_c0_g1	Met-R	Lab-S	1.15089e-08	9.3981e-07	37.721	50.543	55.756	252.015	214.206	369.088	UniRef50_UPI00096B0464 uncharacterized protein LOC109598307 n=1 Tax=Aethina tumida TaxID=116153 RepID=UPI00096B0464 ## UniRef50_UPI00094EFA80 uncharacterized protein LOC109543856 n=1 Tax=Dendroctonus ponderosae TaxID=77166 RepID=UPI00094EFA80
TRINITY_DN23510_c0_g2	Met-R	Lab-S	1.45177e-08	1.15037e-06	0.498	1.604	1.52	7.904	12.31	10.953	UniRef50_A0A1Y1LCT0 Uncharacterized protein n=3 Tax=Photinus pyralis TaxID=7054 RepID=A0A1Y1LCT0_PHOPY ## UniRef50_A0A1Y1LCT0 Uncharacterized protein n=3 Tax=Photinus pyralis TaxID=7054 RepID=A0A1Y1LCT0_PHOPY
TRINITY_DN27239_c0_g1	Met-R	Lab-S	1.54545e-08	1.21429e-06	4.068	9.982	10.225	48.839	50.118	36.224	UniRef50_UPI000C20A354 putative serine protease K12H4.7 n=2 Tax=Onthophagus taurus TaxID=166361 RepID=UPI000C20A354 ## UniRef50_UPI000C20A354 putative serine protease K12H4.7 n=2 Tax=Onthophagus taurus TaxID=166361 RepID=UPI000C20A354 ## UniRef50_UPI000C20A354 putative serine protease K12H4.7 n=2 Tax=Onthophagus taurus TaxID=166361 RepID=UPI000C20A354 ## UniRef50_UPI000C20A354 putative serine pro…
TRINITY_DN25661_c1_g3	Met-R	Lab-S	1.60508e-08	1.25062e-06	0.485	0.731	0.614	23.486	40.247	1.176	UniRef50_K7G6G0 Uncharacterized protein n=4 Tax=Eukaryota TaxID=2759 RepID=K7G6G0_PELSI ## UniRef50_K7G6G0 Uncharacterized protein n=4 Tax=Eukaryota TaxID=2759 RepID=K7G6G0_PELSI ## UniRef50_A0A2H1V0D4 SFRICE_008771 (Fragment) n=2 Tax=Bilateria TaxID=33213 RepID=A0A2H1V0D4_SPOFR
TRINITY_DN22721_c2_g1	Met-R	Lab-S	2.61671e-08	1.98107e-06	0	0	0.142	3.589	3.494	1.968	No_annot
TRINITY_DN18403_c0_g1	Met-R	Lab-S	2.68337e-08	2.02335e-06	0.208	0.131	0	45.786	48.79	0.113	UniRef50_A0A0T6AYP7 Uncharacterized protein n=1 Tax=Oryctes borbonicus TaxID=1629725 RepID=A0A0T6AYP7_9SCAR ## UniRef50_UPI00077DE116 trypsin-1 isoform X1 n=2 Tax=Tribolium castaneum TaxID=7070 RepID=UPI00077DE116
TRINITY_DN19048_c0_g1	Met-R	Lab-S	2.79193e-08	2.09675e-06	0	0	0	0.868	3.661	3.404	UniRef50_A0A1E1W855 Uncharacterized protein (Fragment) n=4 Tax=Ditrysia TaxID=37567 RepID=A0A1E1W855_PECGO
TRINITY_DN17947_c0_g1	Met-R	Lab-S	3.17799e-08	2.36767e-06	0	0.398	0	3.237	5.195	6.167	UniRef50_UPI000C2008DE LOW QUALITY PROTEIN: uncharacterized protein LOC111427121 n=1 Tax=Onthophagus taurus TaxID=166361 RepID=UPI000C2008DE ## UniRef50_UPI000C2008DE LOW QUALITY PROTEIN: uncharacterized protein LOC111427121 n=1 Tax=Onthophagus taurus TaxID=166361 RepID=UPI000C2008DE
TRINITY_DN27511_c1_g2	Met-R	Lab-S	3.66015e-08	2.71606e-06	22.014	13.249	16.533	103.992	107.316	60.249	UniRef50_A0A1Y1L7P3 Uncharacterized protein n=1 Tax=Photinus pyralis TaxID=7054 RepID=A0A1Y1L7P3_PHOPY ## UniRef50_A0A1Y1L7P3 Uncharacterized protein n=1 Tax=Photinus pyralis TaxID=7054 RepID=A0A1Y1L7P3_PHOPY
TRINITY_DN25191_c0_g1	Met-R	Lab-S	4.35972e-08	3.18464e-06	0.654	2.593	1.322	13.019	9.095	15.186	UniRef50_A0A1Y1LH79 Uncharacterized protein (Fragment) n=1 Tax=Photinus pyralis TaxID=7054 RepID=A0A1Y1LH79_PHOPY ## UniRef50_A0A1Y1LH79 Uncharacterized protein (Fragment) n=1 Tax=Photinus pyralis TaxID=7054 RepID=A0A1Y1LH79_PHOPY ## UniRef50_A0A1Y1LH79 Uncharacterized protein (Fragment) n=1 Tax=Photinus pyralis TaxID=7054 RepID=A0A1Y1LH79_PHOPY ## UniRef50_A0A1Y1LH79 Uncharacterized protein (Fra…
TRINITY_DN19445_c0_g1	Met-R	Lab-S	4.37991e-08	3.18694e-06	0	0.077	0.22	2.368	3.064	4.226	UniRef50_A0A1W4WVB2 E3 ubiquitin-protein ligase n=2 Tax=Agrilus planipennis TaxID=224129 RepID=A0A1W4WVB2_AGRPL
TRINITY_DN22015_c18_g1	Met-R	Lab-S	4.50894e-08	3.2681e-06	0.176	0.188	0.414	5.697	2.886	4.201	UniRef50_D6W9V8 Pathogenesis-related protein 5-like Protein n=8 Tax=Polyphaga TaxID=41084 RepID=D6W9V8_TRICA
TRINITY_DN15579_c0_g1	Met-R	Lab-S	4.54117e-08	3.27876e-06	0.331	0.786	0.772	7.758	4.639	6.965	UniRef50_D6W9V8 Pathogenesis-related protein 5-like Protein n=8 Tax=Polyphaga TaxID=41084 RepID=D6W9V8_TRICA
TRINITY_DN24047_c0_g2	Met-R	Lab-S	4.57682e-08	3.29179e-06	0	0	0	1.916	2.753	2.199	UniRef50_A0A139WH52 GPALPP motifs-containing protein 1-like Protein n=2 Tax=Tribolium castaneum TaxID=7070 RepID=A0A139WH52_TRICA
TRINITY_DN29462_c3_g1	Met-R	Lab-S	4.98708e-08	3.57312e-06	0.738	0.262	0.288	4.706	6.606	4.572	UniRef50_Q962T2 60S ribosomal protein L28 n=27 Tax=Neoptera TaxID=33340 RepID=RL28_SPOFR
TRINITY_DN24209_c0_g1	Met-R	Lab-S	6.09015e-08	4.31386e-06	3.491	1.603	6.966	106.155	185.792	10.135	No_annot
TRINITY_DN18549_c0_g1	Met-R	Lab-S	6.72971e-08	4.71332e-06	3.163	4.88	15.113	57.638	45.877	98.537	No_annot
TRINITY_DN29922_c10_g3	Met-R	Lab-S	6.76474e-08	4.71365e-06	18.861	1.876	3.781	75.406	129.343	323.642	No_annot
TRINITY_DN19089_c0_g1	Met-R	Lab-S	7.26885e-08	5.03435e-06	0	0	0.272	2.667	2.818	5.584	UniRef50_U4UDC9 Uncharacterized protein n=1 Tax=Dendroctonus ponderosae TaxID=77166 RepID=U4UDC9_DENPD
TRINITY_DN18110_c0_g1	Met-R	Lab-S	9.27946e-08	6.32871e-06	0	0	0	1.028	2.832	3.301	UniRef50_V5GIG7 Uncharacterized protein (Fragment) n=2 Tax=Anoplophora glabripennis TaxID=217634 RepID=V5GIG7_ANOGL
TRINITY_DN22015_c24_g1	Met-R	Lab-S	9.30693e-08	6.32871e-06	0	0	0	2.499	1.618	2.646	UniRef50_B6V9H2 Thaumatin-like protein (Fragment) n=1 Tax=Tribolium confusum TaxID=7071 RepID=B6V9H2_TRICF
TRINITY_DN19205_c0_g1	Met-R	Lab-S	9.38173e-08	6.35647e-06	0.179	0	0	1.802	3.221	5.061	UniRef50_D6X3R8 E3 ubiquitin-protein ligase listerin-like Protein n=2 Tax=Tribolium castaneum TaxID=7070 RepID=D6X3R8_TRICA
TRINITY_DN29858_c1_g1	Met-R	Lab-S	9.63446e-08	6.50413e-06	0	0	0.391	2.302	5.879	6.7	UniRef50_UPI000C251E1E inhibitor of Bruton tyrosine kinase n=1 Tax=Leptinotarsa decemlineata TaxID=7539 RepID=UPI000C251E1E
TRINITY_DN12011_c0_g1	Met-R	Lab-S	1.1397e-07	7.63387e-06	6.44	27.037	13.733	86.181	107.132	132.716	No_annot
TRINITY_DN30024_c2_g2	Met-R	Lab-S	1.3824e-07	9.10244e-06	4.959	6.994	10.013	36.519	25.352	30.192	UniRef50_D1M827 Ribosomal protein L4 (Fragment) n=2 Tax=Holometabola TaxID=33392 RepID=D1M827_CHRTR ## UniRef50_D1M827 Ribosomal protein L4 (Fragment) n=2 Tax=Holometabola TaxID=33392 RepID=D1M827_CHRTR ## UniRef50_A0A0N1IQ89 60S ribosomal protein L4 n=2 Tax=Papilio machaon TaxID=76193 RepID=A0A0N1IQ89_PAPMA ## UniRef50_A0A0N1IQ89 60S ribosomal protein L4 n=2 Tax=Papilio machaon TaxID=76193 RepID…
TRINITY_DN18523_c0_g1	Met-R	Lab-S	1.77733e-07	1.14607e-05	0	0	0	1.925	2.32	2.236	UniRef50_UPI000C20A720 uncharacterized protein LOC111427547 isoform X1 n=2 Tax=Onthophagus taurus TaxID=166361 RepID=UPI000C20A720 ## UniRef50_UPI000C20A720 uncharacterized protein LOC111427547 isoform X1 n=2 Tax=Onthophagus taurus TaxID=166361 RepID=UPI000C20A720
TRINITY_DN30090_c3_g2	Met-R	Lab-S	1.78867e-07	1.14942e-05	1.16	0.967	2.627	11.724	7.351	14.368	No_annot
TRINITY_DN25368_c0_g3	Met-R	Lab-S	1.94031e-07	1.22996e-05	0	0	0.139	2.234	2.447	3.365	UniRef50_UPI000C20C5ED uncharacterized protein LOC111418328 n=1 Tax=Onthophagus taurus TaxID=166361 RepID=UPI000C20C5ED
TRINITY_DN16556_c0_g1	Met-R	Lab-S	2.04264e-07	1.29045e-05	0.356	0.76	0.832	5.488	8.355	4.309	UniRef50_D6WX09 Uncharacterized protein n=2 Tax=Tribolium castaneum TaxID=7070 RepID=D6WX09_TRICA
TRINITY_DN21872_c0_g1	Met-R	Lab-S	2.28875e-07	1.43623e-05	51.968	2.555	4.081	572.248	409.4	865.259	UniRef50_A0A1S3DU13 myosin heavy chain, muscle-like n=2 Tax=Pancrustacea TaxID=197562 RepID=A0A1S3DU13_DIACI ## UniRef50_A0A1Y1N826 Uncharacterized protein n=5 Tax=Holometabola TaxID=33392 RepID=A0A1Y1N826_PHOPY
TRINITY_DN28424_c2_g1	Met-R	Lab-S	2.47691e-07	1.54394e-05	86.397	57.199	46.928	268.124	326.879	318.682	UniRef50_A0A1J1I8W9 CLUMA_CG008654, isoform A n=1 Tax=Clunio marinus TaxID=568069 RepID=A0A1J1I8W9_9DIPT
TRINITY_DN25562_c0_g1	Met-R	Lab-S	2.67271e-07	1.66046e-05	2.093	2.545	2.51	10.143	13.901	10.407	UniRef50_S4PAZ5 Uncharacterized protein (Fragment) n=1 Tax=Pararge aegeria TaxID=116150 RepID=S4PAZ5_9NEOP ## UniRef50_A0A1B6GU06 Uncharacterized protein n=3 Tax=Cicadellinae TaxID=33370 RepID=A0A1B6GU06_9HEMI ## UniRef50_A0A1B6KWH0 Uncharacterized protein (Fragment) n=1 Tax=Graphocephala atropunctata TaxID=36148 RepID=A0A1B6KWH0_9HEMI ## UniRef50_A0A1B6GU06 Uncharacterized protein n=3 Tax=Cicade…
TRINITY_DN18543_c0_g1	Met-R	Lab-S	3.18825e-07	1.95476e-05	0.586	1.897	0.697	10.835	5.171	11.592	UniRef50_UPI00083C53E9 uncharacterized protein LOC108563386 n=1 Tax=Nicrophorus vespilloides TaxID=110193 RepID=UPI00083C53E9
TRINITY_DN23972_c5_g6	Met-R	Lab-S	3.58805e-07	2.1927e-05	19.506	9.287	4.067	196.029	40.007	99.105	No_annot
TRINITY_DN18611_c0_g1	Met-R	Lab-S	4.12858e-07	2.50664e-05	0	0	0	0.512	4.592	2.326	No_annot
TRINITY_DN21349_c4_g1	Met-R	Lab-S	4.56291e-07	2.75247e-05	119.672	133.692	171.666	360.345	1448.89	1011.77	UniRef50_Q9XYY0 Trypsinogen RdoT2 n=1 Tax=Rhyzopertha dominica TaxID=92692 RepID=Q9XYY0_RHYDO ## UniRef50_Q9XYY0 Trypsinogen RdoT2 n=1 Tax=Rhyzopertha dominica TaxID=92692 RepID=Q9XYY0_RHYDO
TRINITY_DN22530_c0_g1	Met-R	Lab-S	4.57772e-07	2.75252e-05	70.738	81.001	165.673	528.487	761.683	475.756	No_annot
TRINITY_DN26295_c0_g2	Met-R	Lab-S	4.97199e-07	2.98001e-05	69.541	97.548	104.97	562.667	492.052	282.952	No_annot
TRINITY_DN29245_c0_g3	Met-R	Lab-S	5.13046e-07	3.06516e-05	0.232	0	0	3.697	1.828	3.99	No_annot
TRINITY_DN22050_c0_g1	Met-R	Lab-S	5.93934e-07	3.4708e-05	0.969	2.329	1.68	7.061	10.364	11.693	No_annot
TRINITY_DN29795_c0_g1	Met-R	Lab-S	6.01884e-07	3.5063e-05	0	0	0	5.256	1.72	0.544	No_annot
TRINITY_DN25027_c0_g3	Met-R	Lab-S	6.38833e-07	3.68709e-05	1.83	2.734	2.569	6.351	21.978	14.109	No_annot
TRINITY_DN28463_c0_g4	Met-R	Lab-S	6.45717e-07	3.69263e-05	6.251	2.543	1.255	32.903	9.862	46.705	UniRef50_A0A2H1WP41 SFRICE_024301 (Fragment) n=1 Tax=Spodoptera frugiperda TaxID=7108 RepID=A0A2H1WP41_SPOFR
TRINITY_DN16452_c0_g1	Met-R	Lab-S	6.79776e-07	3.85207e-05	0.372	0	0	2.307	4.985	4.25	UniRef50_A0A1Y1N255 Uncharacterized protein n=1 Tax=Photinus pyralis TaxID=7054 RepID=A0A1Y1N255_PHOPY
TRINITY_DN22015_c8_g1	Met-R	Lab-S	7.14279e-07	4.03536e-05	0.914	0	1.074	10.611	6.767	9.58	UniRef50_B6V9H2 Thaumatin-like protein (Fragment) n=1 Tax=Tribolium confusum TaxID=7071 RepID=B6V9H2_TRICF
TRINITY_DN28628_c4_g1	Met-R	Lab-S	7.76956e-07	4.35003e-05	0	0	0	1.726	2.285	2.135	No_annot
TRINITY_DN21912_c0_g1	Met-R	Lab-S	7.9068e-07	4.41365e-05	21.636	37.426	27.489	100.719	127.293	131.235	UniRef50_A0A154P3Q8 Elongation factor 2 n=93 Tax=Bilateria TaxID=33213 RepID=A0A154P3Q8_9HYME ## UniRef50_A0A154P3Q8 Elongation factor 2 n=93 Tax=Bilateria TaxID=33213 RepID=A0A154P3Q8_9HYME ## UniRef50_H3FAW0 Pyruvate kinase n=2 Tax=Pristionchus pacificus TaxID=54126 RepID=H3FAW0_PRIPA
TRINITY_DN19083_c0_g1	Met-R	Lab-S	8.8389e-07	4.90467e-05	1.405	1.995	8.761	46.315	26.553	25.311	UniRef50_A0A1W4XV51 apolipophorins isoform X1 n=2 Tax=Agrilus planipennis TaxID=224129 RepID=A0A1W4XV51_AGRPL
TRINITY_DN16951_c0_g1	Met-R	Lab-S	9.10742e-07	5.02878e-05	0	0	0	0.948	2.405	3.03	No_annot
TRINITY_DN24008_c3_g1	Met-R	Lab-S	9.13028e-07	5.02878e-05	9.285	3.728	16.347	43.798	47.657	95.062	UniRef50_A0A1Y1LH79 Uncharacterized protein (Fragment) n=1 Tax=Photinus pyralis TaxID=7054 RepID=A0A1Y1LH79_PHOPY ## UniRef50_A0A1Y1LH79 Uncharacterized protein (Fragment) n=1 Tax=Photinus pyralis TaxID=7054 RepID=A0A1Y1LH79_PHOPY ## UniRef50_A0A1Y1LH79 Uncharacterized protein (Fragment) n=1 Tax=Photinus pyralis TaxID=7054 RepID=A0A1Y1LH79_PHOPY ## UniRef50_A0A1Y1LH79 Uncharacterized protein (Fra…
TRINITY_DN22015_c14_g1	Met-R	Lab-S	9.14324e-07	5.02878e-05	0.505	0.542	0	3.911	4.836	5.565	UniRef50_UPI000C254F5F pathogenesis-related protein 5-like n=1 Tax=Leptinotarsa decemlineata TaxID=7539 RepID=UPI000C254F5F
TRINITY_DN18363_c0_g1	Met-R	Lab-S	9.42757e-07	5.16996e-05	0	0.366	0	1.652	4.774	5.662	UniRef50_V5IAT0 Twitchin (Fragment) n=4 Tax=Arthropoda TaxID=6656 RepID=V5IAT0_ANOGL
TRINITY_DN24101_c2_g1	Met-R	Lab-S	9.8151e-07	5.36674e-05	6.844	3.776	12.089	27.823	32.084	77.306	UniRef50_A0A1Y1LH79 Uncharacterized protein (Fragment) n=1 Tax=Photinus pyralis TaxID=7054 RepID=A0A1Y1LH79_PHOPY
TRINITY_DN18980_c0_g1	Met-R	Lab-S	1.05476e-06	5.71106e-05	0	0	0	0.633	4.125	2.038	UniRef50_UPI00096B44B1 LOW QUALITY PROTEIN: fatty acid synthase-like n=3 Tax=Aethina tumida TaxID=116153 RepID=UPI00096B44B1
TRINITY_DN18086_c0_g1	Met-R	Lab-S	1.08373e-06	5.84029e-05	1.563	0.713	0	5.971	13.134	15.821	UniRef50_D6WAB6 DmX-like protein 2 n=8 Tax=Polyphaga TaxID=41084 RepID=D6WAB6_TRICA
TRINITY_DN26971_c1_g1	Met-R	Lab-S	1.16047e-06	6.2002e-05	0.179	0.372	0.437	4.05	4.68	2.623	UniRef50_UPI0006C98CAB chymotrypsin-2-like n=2 Tax=Copidosoma floridanum TaxID=29053 RepID=UPI0006C98CAB ## UniRef50_V5GTK1 Transposon Ty3-G Gag-Pol polyprotein n=2 Tax=Anoplophora glabripennis TaxID=217634 RepID=V5GTK1_ANOGL ## UniRef50_UPI000457352E transmembrane protease serine 12 n=1 Tax=Callorhinchus milii TaxID=7868 RepID=UPI000457352E ## UniRef50_V5GTK1 Transposon Ty3-G Gag-Pol polyprotein…
TRINITY_DN18269_c0_g1	Met-R	Lab-S	1.27081e-06	6.73206e-05	0.215	0.229	1.044	3.687	9.648	5.374	UniRef50_A0A0T6AVE2 Peptidase (Fragment) n=3 Tax=Polyphaga TaxID=41084 RepID=A0A0T6AVE2_9SCAR
TRINITY_DN18774_c0_g1	Met-R	Lab-S	1.3179e-06	6.96179e-05	0	0	0	2.529	2.619	1.03	UniRef50_A0A0T6BBA9 Sterile alpha motif containing protein (Fragment) n=5 Tax=Neoptera TaxID=33340 RepID=A0A0T6BBA9_9SCAR
TRINITY_DN22569_c0_g2	Met-R	Lab-S	1.39162e-06	7.28945e-05	0	1.198	0	7.833	10.648	15.72	No_annot
TRINITY_DN25245_c2_g6	Met-R	Lab-S	1.83113e-06	9.51171e-05	1.555	0	0	15.816	41.622	9.565	No_annot
TRINITY_DN16994_c0_g1	Met-R	Lab-S	2.04962e-06	0.000105878	0.245	0.264	0.197	3.562	2.822	2.525	UniRef50_A0A1W4XIU2 uncharacterized protein LOC108742151 n=1 Tax=Agrilus planipennis TaxID=224129 RepID=A0A1W4XIU2_AGRPL ## UniRef50_A0A1W4XIU2 uncharacterized protein LOC108742151 n=1 Tax=Agrilus planipennis TaxID=224129 RepID=A0A1W4XIU2_AGRPL
TRINITY_DN24421_c0_g2	Met-R	Lab-S	2.05665e-06	0.000105948	0	0	0	0.593	3.54	2.359	UniRef50_UPI000C25545B transmembrane and TPR repeat-containing protein 4-like n=1 Tax=Leptinotarsa decemlineata TaxID=7539 RepID=UPI000C25545B
TRINITY_DN29922_c8_g1	Met-R	Lab-S	2.29322e-06	0.000116848	0.36	0.117	0.13	3.606	3.327	2.019	No_annot
TRINITY_DN21349_c6_g1	Met-R	Lab-S	2.37025e-06	0.000120118	0.441	0.938	0	2.735	4.955	45.377	UniRef50_V5I9G3 Trypsin (Fragment) n=4 Tax=Cucujiformia TaxID=41088 RepID=V5I9G3_ANOGL
TRINITY_DN22939_c0_g1	Met-R	Lab-S	2.78489e-06	0.00014037	2.87	1.229	0.609	17.026	25.709	3.911	UniRef50_A0A1Y1JU93 UDP-glucuronosyltransferase n=8 Tax=Polyphaga TaxID=41084 RepID=A0A1Y1JU93_PHOPY ## UniRef50_A0A1Y1JU93 UDP-glucuronosyltransferase n=8 Tax=Polyphaga TaxID=41084 RepID=A0A1Y1JU93_PHOPY
TRINITY_DN21489_c1_g2	Met-R	Lab-S	2.82971e-06	0.000142246	0	0.351	0	2.03	2.588	6.745	UniRef50_UPI0004946C7E hypothetical protein n=1 Tax=Rickettsia helvetica TaxID=35789 RepID=UPI0004946C7E ## UniRef50_K7JGN9 Uncharacterized protein n=3 Tax=Nasonia vitripennis TaxID=7425 RepID=K7JGN9_NASVI
TRINITY_DN25966_c16_g1	Met-R	Lab-S	3.04136e-06	0.000152068	0.914	1.96	0	7.958	13.136	17.648	UniRef50_A0A1L8EAC8 Putative enolase (Fragment) n=9 Tax=Holometabola TaxID=33392 RepID=A0A1L8EAC8_HAEIR
TRINITY_DN29983_c3_g1	Met-R	Lab-S	3.89915e-06	0.000190875	0	0	0	1.25	3.559	1.221	UniRef50_A0A146KT12 Histone-lysine N-methyltransferase SETMAR (Fragment) n=3 Tax=Ecdysozoa TaxID=1206794 RepID=A0A146KT12_LYGHE
TRINITY_DN17664_c0_g1	Met-R	Lab-S	4.20896e-06	0.000204968	0	0.262	0.288	2.353	2.983	3.227	UniRef50_UPI000C253278 unconventional myosin-XVIIIa-like n=1 Tax=Leptinotarsa decemlineata TaxID=7539 RepID=UPI000C253278
TRINITY_DN17630_c0_g1	Met-R	Lab-S	4.23566e-06	0.000205732	0	0	0	0.382	2.756	3.488	UniRef50_UPI00083C022F titin-like isoform X5 n=2 Tax=Nicrophorus vespilloides TaxID=110193 RepID=UPI00083C022F
TRINITY_DN28032_c0_g1	Met-R	Lab-S	5.19244e-06	0.00024707	0	1.61	0.789	5.548	12.395	14.014	UniRef50_A0A1W4X7A0 sn1-specific diacylglycerol lipase alpha isoform X1 n=2 Tax=Polyphaga TaxID=41084 RepID=A0A1W4X7A0_AGRPL
TRINITY_DN17904_c1_g1	Met-R	Lab-S	5.21787e-06	0.000247139	0	0	0	2.008	2.075	1.64	No_annot
TRINITY_DN16738_c0_g1	Met-R	Lab-S	5.28685e-06	0.000249657	0	0	1.469	11.974	15.364	11.386	UniRef50_T1HWC3 Spectrin beta chain n=13 Tax=Neoptera TaxID=33340 RepID=T1HWC3_RHOPR
TRINITY_DN21489_c1_g1	Met-R	Lab-S	5.64838e-06	0.000263403	0	0.147	0	1.19	1.927	3.713	UniRef50_UPI00084B4E7B uncharacterized protein LOC108672709 n=1 Tax=Hyalella azteca TaxID=294128 RepID=UPI00084B4E7B ## UniRef50_UPI0008F9B86C uncharacterized protein LOC109039361 n=2 Tax=Bemisia tabaci TaxID=7038 RepID=UPI0008F9B86C
TRINITY_DN19073_c0_g1	Met-R	Lab-S	6.32947e-06	0.000290813	173.334	86.542	115.845	535.073	430.381	570.672	UniRef50_A0A0N0PC07 Aconitate hydratase, mitochondrial n=10 Tax=Opisthokonta TaxID=33154 RepID=A0A0N0PC07_PAPMA ## UniRef50_A0A1Y3BN51 Uncharacterized protein n=1 Tax=Euroglyphus maynei TaxID=6958 RepID=A0A1Y3BN51_EURMA
TRINITY_DN18695_c0_g1	Met-R	Lab-S	6.99003e-06	0.000317266	2.237	1.372	8.188	20.229	23.001	25.854	UniRef50_B4INN2 GM23419 n=4 Tax=Bilateria TaxID=33213 RepID=B4INN2_DROSE ## UniRef50_B4INN2 GM23419 n=4 Tax=Bilateria TaxID=33213 RepID=B4INN2_DROSE
TRINITY_DN40358_c0_g1	Met-R	Lab-S	7.95312e-06	0.000358369	0	0	0	0.544	1.948	3.695	No_annot
TRINITY_DN29767_c1_g2	Met-R	Lab-S	8.17475e-06	0.000366589	0.383	0.892	0.927	5.415	3.657	5.998	No_annot
TRINITY_DN23902_c0_g1	Met-R	Lab-S	1.02095e-05	0.000448165	0.068	0	0	2.37	2.033	1.545	UniRef50_A0A1W4XKH3 uncharacterized protein LOC108742291 isoform X1 n=2 Tax=Agrilus planipennis TaxID=224129 RepID=A0A1W4XKH3_AGRPL
TRINITY_DN26409_c2_g2	Met-R	Lab-S	1.05134e-05	0.00045721	1.938	4.337	54.722	452.658	266.4	397.08	UniRef50_A0A1Y1LH79 Uncharacterized protein (Fragment) n=1 Tax=Photinus pyralis TaxID=7054 RepID=A0A1Y1LH79_PHOPY
TRINITY_DN19698_c1_g1	Met-R	Lab-S	1.07275e-05	0.000465439	0.462	0.817	1.293	4.26	5.64	6.196	No_annot
TRINITY_DN22347_c0_g1	Met-R	Lab-S	1.1225e-05	0.000484775	1.743	1.879	0.964	8.257	8.316	5.905	No_annot
TRINITY_DN38004_c0_g1	Met-R	Lab-S	1.18979e-05	0.000512652	0	0	0.103	2.224	1.473	3.025	No_annot
TRINITY_DN16417_c0_g1	Met-R	Lab-S	1.23472e-05	0.000527152	1.416	3.039	4.998	9.138	21.51	15.115	UniRef50_UPI0008745169 titin isoform X4 n=1 Tax=Anoplophora glabripennis TaxID=217634 RepID=UPI0008745169
TRINITY_DN19654_c0_g1	Met-R	Lab-S	1.24928e-05	0.000531654	0	0	0	0	1.215	12.473	UniRef50_C7SHP1 RNA-directed RNA polymerase n=47 Tax=Chronic bee paralysis virus TaxID=180822 RepID=C7SHP1_9VIRU
TRINITY_DN17194_c0_g1	Met-R	Lab-S	1.25095e-05	0.000531654	0	0	0	1.113	2.905	1.583	UniRef50_A0A1B6JEC4 Uncharacterized protein (Fragment) n=1 Tax=Homalodisca liturata TaxID=320908 RepID=A0A1B6JEC4_9HEMI
TRINITY_DN25234_c0_g1	Met-R	Lab-S	1.36655e-05	0.000572968	0.349	0.114	0.676	3.598	4.44	2.79	UniRef50_UPI00096AE9F7 LOW QUALITY PROTEIN: piezo-type mechanosensitive ion channel component-like n=1 Tax=Aethina tumida TaxID=116153 RepID=UPI00096AE9F7 ## UniRef50_UPI000C1FDE0F piezo-type mechanosensitive ion channel component isoform X1 n=7 Tax=Onthophagus taurus TaxID=166361 RepID=UPI000C1FDE0F ## UniRef50_UPI000C1FDE0F piezo-type mechanosensitive ion channel component isoform X1 n=7 Tax=On…
TRINITY_DN26022_c1_g1	Met-R	Lab-S	1.46107e-05	0.000608507	1.086	0	0.725	3.794	7.044	11.601	No_annot
TRINITY_DN20845_c0_g1	Met-R	Lab-S	1.47975e-05	0.000614919	0.365	0.131	0.291	2.673	3.168	2.379	No_annot
TRINITY_DN29907_c3_g1	Met-R	Lab-S	1.52607e-05	0.000631361	38.207	87.074	38.802	243.334	509.293	132.595	UniRef50_UPI000C1FE7F0 chondroitin proteoglycan-2-like n=1 Tax=Onthophagus taurus TaxID=166361 RepID=UPI000C1FE7F0 ## UniRef50_UPI000C1FE7F0 chondroitin proteoglycan-2-like n=1 Tax=Onthophagus taurus TaxID=166361 RepID=UPI000C1FE7F0 ## UniRef50_UPI000C1FE7F0 chondroitin proteoglycan-2-like n=1 Tax=Onthophagus taurus TaxID=166361 RepID=UPI000C1FE7F0
TRINITY_DN29392_c19_g1	Met-R	Lab-S	1.75201e-05	0.000720057	1.002	2.848	0.779	8.677	5.806	12.855	UniRef50_UPI00096B376D muscle LIM protein Mlp84B-like n=1 Tax=Aethina tumida TaxID=116153 RepID=UPI00096B376D
TRINITY_DN18827_c0_g2	Met-R	Lab-S	1.92734e-05	0.000783507	0	0	0	3.704	0.335	2.117	UniRef50_M3Y0Q0 Ribosomal protein S29 n=26 Tax=Eukaryota TaxID=2759 RepID=M3Y0Q0_MUSPF
TRINITY_DN19767_c0_g1	Met-R	Lab-S	2.02429e-05	0.000819353	13.163	5.661	4.797	18.284	36.506	41.886	UniRef50_UPI00094EC538 voltage-dependent anion-selective channel-like isoform X3 n=1 Tax=Dendroctonus ponderosae TaxID=77166 RepID=UPI00094EC538 ## UniRef50_A0A1J1ILA0 CLUMA_CG013799, isoform A n=3 Tax=Holometabola TaxID=33392 RepID=A0A1J1ILA0_9DIPT ## UniRef50_N6TXU3 Uncharacterized protein (Fragment) n=4 Tax=Dendroctonus ponderosae TaxID=77166 RepID=N6TXU3_DENPD ## UniRef50_N6TXU3 Uncharacteriz…
TRINITY_DN30120_c1_g1	Met-R	Lab-S	2.03259e-05	0.000820939	0	0	0	0.424	3.052	2.419	UniRef50_A0A1W4XV87 fatty acid synthase-like n=3 Tax=Polyphaga TaxID=41084 RepID=A0A1W4XV87_AGRPL
TRINITY_DN17070_c0_g1	Met-R	Lab-S	2.16753e-05	0.000866769	0	0	0	0	7.193	2.143	UniRef50_UPI00083C6C72 apolipophorins n=1 Tax=Nicrophorus vespilloides TaxID=110193 RepID=UPI00083C6C72
TRINITY_DN17647_c0_g1	Met-R	Lab-S	2.17991e-05	0.000867327	0	0	0	0	7.396	2.003	UniRef50_UPI00083C6C72 apolipophorins n=1 Tax=Nicrophorus vespilloides TaxID=110193 RepID=UPI00083C6C72
TRINITY_DN27525_c0_g2	Met-R	Lab-S	2.18931e-05	0.000869218	53.897	3.78	48.52	315.219	296.823	261.19	No_annot
TRINITY_DN28984_c0_g1	Met-R	Lab-S	2.25857e-05	0.000894816	1.666	2.212	1.937	11.901	7.699	5.765	UniRef50_A0A139WDQ9 Uncharacterized protein n=2 Tax=Tribolium castaneum TaxID=7070 RepID=A0A139WDQ9_TRICA ## UniRef50_A0A139WDQ9 Uncharacterized protein n=2 Tax=Tribolium castaneum TaxID=7070 RepID=A0A139WDQ9_TRICA ## UniRef50_A0A139WDQ9 Uncharacterized protein n=2 Tax=Tribolium castaneum TaxID=7070 RepID=A0A139WDQ9_TRICA ## UniRef50_A0A139WDQ9 Uncharacterized protein n=2 Tax=Tribolium castaneum …
TRINITY_DN24237_c1_g1	Met-R	Lab-S	2.31289e-05	0.000912469	0	0	0	1.304	2.334	1.474	No_annot
TRINITY_DN14331_c0_g1	Met-R	Lab-S	2.32411e-05	0.000914403	0	0	0	1.842	2.294	1.052	No_annot
TRINITY_DN29241_c0_g2	Met-R	Lab-S	2.34414e-05	0.000917059	27.072	122.211	239.575	1253.09	621.155	809.596	No_annot
TRINITY_DN26411_c2_g5	Met-R	Lab-S	2.37998e-05	0.000927199	16.365	33.307	25.517	119.066	51.235	139.058	No_annot
TRINITY_DN16766_c0_g1	Met-R	Lab-S	2.55949e-05	0.000992999	0.257	0	0.3	1.477	2.228	5.346	No_annot
