# Supplementary material for: Transcriptomic analysis of s-methoprene resistance in the lesser grain borer, Rhyzopertha dominica, and evaluation of piperonyl butoxide as a resistance breaker
Source: BMC Genomics. 2021 Jan 20;22:65. doi: 10.1186/s12864-020-07354-8 (PMC7819154; doi:10.1186/s12864-020-07354-8)
Supplement: Supplementary file 6 — Additional file 6: Table S4. Primers used for the validation qPCRs. [file 12864_2020_7354_MOESM6_ESM.xlsx]

## Sheet: Sheet1
Unigene name	Annotation	Forward (5'- 3')	Reverse (5'-3')	Amplicon size (bp)
DN26728_c0_g1	CYP6BQ11	ATTTTCTATTTGGCCGGGTT	GCGGATATTTGCGAAGTGTT	207
DN29475_c1_g7	CYP3747A	CCTCGTCTTGGCGTTGTC	CAGTTTAAGACCTATGATCTCACTCAA	178
DN28703_c3_g1	CYP6RU	GATACAGTTTGCGAACAGCTTC	CTATAGTCGACCGTTTCAGCAAC	178
DN23343_c0_g1	CYP6RU	CTTCAAATGGGCAACCAACT	TAAGCTGAGGGGAAGCCATA	194
DN28703_c3_g3	CYP6RU1	CATGCAGACGAAGGAAAGC	ATTGTCGTTTCAAGGAAGGC	169
DN26679_c1_g1	CYP3747A	ATAACACTGTCGTGGACCTCC	TGAATTGCGGGATGAAGTG	151
Reference genes
rps6		CCCCAGAAAGAGGGAAAGAA	CTTATGACGCTGAGCCAACA	171
syntaxin 1		GCAGAGGTGGAGGAGATCAG	CGGACTTTGTTGGCAGTTTT	167
